# Supplementary material
Source: HighWire-hosted journal article supplement (http://thorax.bmjjournals.com/highwire/filestream/174130/field_highwire_adjunct_files/4/JB_Supplementary_Table_1.pdf)
Supplement: JB_Supplementary_Table_1.pdf [file JB_Supplementary_Table_1.pdf]

**Supplementary Table 1.** List of genes (including 2kb 5' and 3' to the gene) with a greater amount (measured in base pairs) of HTE DHS than all five background cell types DHS combined.

| Gene Name | Gene RefSeq | Gene Chrom | Gene Strand | Start Minus 2kbp | Stop Plus 2kbp | TE DHS coverage(bp) | Background DHS coverage(bp) | Expression Value |
|-----------|-------------|------------|-------------|------------------|----------------|---------------------|-----------------------------|------------------|
| KRT5      | NM_000424   | chr12      | -           | 52906357         | 52916244       | 2264                | 306                         | 15.76723         |
| KRT6A     | NM_005554   | chr12      | -           | 52878956         | 52889182       | 816                 | 156                         | 15.748045        |
| TMSL3     | NM_183049   | chr4       | -           | 91757640         | 91762270       | 176                 | 0                           | 15.7353          |
| KRT17     | NM_000422   | chr17      | -           | 39773690         | 39782883       | 3011                | 2547                        | 15.61449         |
| KRT6C     | NM_173086   | chr12      | -           | 52860298         | 52869570       | 365                 | 0                           | 15.37582         |
| EDF1      | NM_153200   | chr9       | -           | 139755231        | 139762739      | 1854                | 1698                        | 15.2039775       |
| ANXA8L2   | NM_001630   | chr10      | +           | 47744918         | 47765041       | 474                 | 273                         | 15.16625         |
| H2AFZ     | NM_002106   | chr4       | -           | 100867242        | 100873513      | 3459                | 3376                        | 15.116015        |
| GJB2      | NM_004004   | chr13      | -           | 20759602         | 20769115       | 2787                | 2738                        | 15.024885        |
| FGFBP1    | NM_005130   | chr4       | -           | 15935191         | 15941972       | 878                 | 492                         | 15.02352         |
| PTHLH     | NM_198966   | chr12      | -           | 28109015         | 28124895       | 3201                | 2654                        | 14.96137833      |
| SPRR1A    | NM_005987   | chr1       | +           | 152954555        | 152960291      | 336                 | 0                           | 14.586635        |
| PRKAR1A   | NM_212472   | chr17      | +           | 66506541         | 66530911       | 2093                | 2057                        | 14.521455        |
| SPRR1B    | NM_003125   | chr1       | +           | 153001677        | 153007377      | 1104                | 398                         | 14.50909         |
| SLC25A1   | NM_005984   | chr22      | -           | 19161092         | 19168302       | 4127                | 3759                        | 14.37009         |
| GABARAPL1 | NM_031412   | chr12      | +           | 10363487         | 10377725       | 2980                | 2932                        | 14.36447         |
| KLK5      | NM_012427   | chr19      | -           | 51444557         | 51458345       | 667                 | 514                         | 14.36122         |
| SERPINB3  | NM_006919   | chr18      | -           | 61320429         | 61331198       | 419                 | 349                         | 14.35049         |
| NUPR1     | NM_012385   | chr16      | -           | 28546660         | 28552496       | 891                 | 792                         | 14.322175        |
| CEACAM6   | NM_002483   | chr19      | +           | 42257396         | 42278114       | 1285                | 724                         | 14.291405        |
| MARCKS    | NM_002356   | chr6       | +           | 114176525        | 114186653      | 5430                | 5111                        | 14.242325        |

|         |              |       |   |           |           |      |      |             |
|---------|--------------|-------|---|-----------|-----------|------|------|-------------|
| KRT6B   | NM_005555    | chr12 | - | 52838433  | 52847911  | 351  | 0    | 14.240575   |
| S100A9  | NM_002965    | chr1  | + | 153328328 | 153335504 | 1044 | 678  | 14.167335   |
| MRPS15  | NM_031280    | chr1  | - | 36919360  | 36932041  | 2067 | 2054 | 14.14857    |
| AKR1C1  | NM_001353    | chr10 | + | 5003452   | 5022159   | 1028 | 775  | 14.114515   |
| FAM60A  | NM_021238    | chr12 | - | 31431518  | 31481122  | 3115 | 3083 | 14.08635    |
| SCEL    | NM_144777    | chr13 | + | 78107807  | 78221399  | 1532 | 1002 | 14.0761     |
| NARS    | NM_004539    | chr18 | - | 55265892  | 55291178  | 1156 | 1133 | 14.042685   |
| PRDX4   | NM_006406    | chrX  | + | 23683643  | 23706515  | 1121 | 1027 | 14.03884    |
| TINF2   | NM_012461    | chr14 | - | 24706849  | 24713881  | 1594 | 1446 | 14.035445   |
| UGT1A1  | NM_000463    | chr2  | + | 234666917 | 234683946 | 868  | 161  | 13.983455   |
| RPL36   | NM_033643    | chr19 | + | 5688270   | 5693679   | 4098 | 3868 | 13.9024975  |
| PDPN    | NM_198389    | chr1  | + | 13908250  | 13946453  | 4083 | 2626 | 13.89192    |
| SSH3    | NM_017857    | chr11 | + | 67068917  | 67082079  | 4898 | 3960 | 13.8244075  |
| TRIP10  | NM_004240    | chr19 | + | 6737705   | 6753530   | 7349 | 6898 | 13.82371    |
| CALML3  | NM_005185    | chr10 | + | 5564922   | 5570226   | 1408 | 719  | 13.81053    |
| PIP4K2C | NM_024779    | chr12 | + | 57982940  | 57999212  | 2999 | 2957 | 13.782845   |
| GPX4    | NM_002085    | chr19 | + | 1101934   | 1108788   | 6073 | 6071 | 13.73975667 |
| KCTD11  | NM_001002914 | chr17 | + | 7253206   | 7260263   | 4565 | 4373 | 13.73162    |
| ZFP36   | NM_003407    | chr19 | + | 39895485  | 39902046  | 4849 | 3811 | 13.72992    |
| CIRBP   | NM_001280    | chr19 | + | 1267265   | 1275172   | 3804 | 2943 | 13.71607    |
| HMGB3   | NM_005342    | chrX  | + | 150149761 | 150161249 | 3059 | 2748 | 13.66429    |
| NCDN    | NM_014284    | chr1  | + | 36021391  | 36034381  | 4298 | 3582 | 13.6359     |
| COQ5    | NM_032314    | chr12 | - | 120939080 | 120968965 | 1360 | 1325 | 13.634705   |
| PRSS8   | NM_002773    | chr16 | - | 31140752  | 31149152  | 4595 | 3851 | 13.618025   |

|           |           |       |   |           |           |      |      |            |
|-----------|-----------|-------|---|-----------|-----------|------|------|------------|
| PRNP      | NM_183079 | chr20 | + | 4664795   | 4684235   | 1933 | 1746 | 13.60486   |
| PAICS     | NM_006452 | chr4  | + | 57299913  | 57329535  | 1952 | 1902 | 13.484505  |
| NAE1      | NM_003905 | chr16 | - | 66834779  | 66866880  | 1498 | 1120 | 13.466805  |
| C1QBP     | NM_001212 | chr17 | - | 5334097   | 5344472   | 1382 | 1330 | 13.45343   |
| BTG1      | NM_001731 | chr12 | - | 92532052  | 92541674  | 2694 | 2692 | 13.41024   |
| NUS1      | NM_138459 | chr6  | + | 117994615 | 118033887 | 1660 | 1282 | 13.40878   |
| PPP4R1    | NM_005134 | chr18 | - | 9544790   | 9616601   | 3151 | 3023 | 13.39344   |
| PREP      | NM_002726 | chr6  | - | 105723440 | 105853000 | 3862 | 3733 | 13.33848   |
| YTHDC1    | NM_133370 | chr4  | - | 69174103  | 69217825  | 1095 | 1079 | 13.32953   |
| ESRP1     | NM_017697 | chr8  | + | 95651362  | 95721695  | 5131 | 4095 | 13.3271975 |
| DYNLT1    | NM_006519 | chr6  | - | 159055505 | 159067805 | 2167 | 2149 | 13.3114    |
| C6orf72   | NM_138785 | chr6  | + | 149885526 | 149914068 | 2403 | 2004 | 13.25113   |
| EIF2S1    | NM_004094 | chr14 | + | 67825032  | 67855234  | 2069 | 1797 | 13.249685  |
| NANOS1    | NM_199461 | chr10 | + | 120787226 | 120795855 | 2385 | 2362 | 13.24876   |
| TSPAN13   | NM_014399 | chr7  | + | 16791349  | 16826162  | 1888 | 1588 | 13.198795  |
| RAB38     | NM_022337 | chr11 | - | 87844413  | 87910636  | 1001 | 917  | 13.197265  |
| SOX4      | NM_003107 | chr6  | + | 21591970  | 21600850  | 4534 | 4367 | 13.17126   |
| ACTR10    | NM_018477 | chr14 | + | 58664831  | 58704354  | 1466 | 1465 | 13.116875  |
| TMPRSS11E | NM_014058 | chr4  | + | 69311165  | 69365323  | 540  | 531  | 13.11672   |
| UFM1      | NM_016617 | chr13 | + | 38921940  | 38939144  | 1200 | 1142 | 13.11457   |
| DSC3      | NM_024423 | chr18 | - | 28568050  | 28624782  | 3107 | 1343 | 13.09876   |
| CCNG2     | NM_004354 | chr4  | + | 78076355  | 78093214  | 2306 | 2153 | 13.09432   |
| ARF5      | NM_001662 | chr7  | + | 127226515 | 127233753 | 2026 | 1995 | 13.09363   |
| ZNF703    | NM_025069 | chr8  | + | 37551299  | 37558397  | 5567 | 4645 | 13.08573   |

|           |           |       |   |           |           |       |       |           |
|-----------|-----------|-------|---|-----------|-----------|-------|-------|-----------|
| CSNK2A1   | NM_177560 | chr20 | - | 461336    | 526483    | 2599  | 2519  | 13.072325 |
| BNC1      | NM_001717 | chr15 | - | 83922653  | 83955469  | 3866  | 3765  | 13.064775 |
| FEM1A     | NM_018708 | chr19 | + | 4789726   | 4797572   | 1723  | 1398  | 13.06051  |
| PRRG4     | NM_024081 | chr11 | + | 32849487  | 32878106  | 2523  | 2434  | 13.05982  |
| UMPS      | NM_000373 | chr3  | + | 124447211 | 124470120 | 1996  | 1773  | 13.036375 |
| CAPNS2    | NM_032330 | chr16 | + | 55598582  | 55603593  | 332   | 0     | 13.03131  |
| SERPINB7  | NM_003784 | chr18 | + | 61440610  | 61474605  | 880   | 627   | 13.010615 |
| ATF5      | NM_012068 | chr19 | + | 50429957  | 50439194  | 2514  | 2422  | 13.00015  |
| PDCD5     | NM_004708 | chr19 | + | 33070102  | 33080330  | 1574  | 1445  | 12.993845 |
| HN1L      | NM_144570 | chr16 | + | 1726276   | 1754074   | 3320  | 2799  | 12.971635 |
| RDX       | NM_002906 | chr11 | - | 110098164 | 110169438 | 3177  | 2598  | 12.963145 |
| NKX2-1    | NM_003317 | chr14 | - | 36983602  | 36990904  | 6783  | 5668  | 12.95704  |
| SERPINB4  | NM_002974 | chr18 | - | 61302491  | 61313503  | 626   | 422   | 12.94     |
| FZD6      | NM_003506 | chr8  | + | 104309057 | 104347095 | 1798  | 1467  | 12.926045 |
| KCNK6     | NM_004823 | chr19 | + | 38808482  | 38821650  | 2415  | 2088  | 12.916985 |
| KLF5      | NM_001730 | chr13 | + | 73631140  | 73653677  | 3558  | 2801  | 12.886225 |
| ATP6V1D   | NM_015994 | chr14 | - | 67802587  | 67828592  | 1951  | 1755  | 12.84845  |
| SLC6A8    | NM_005629 | chrX  | + | 152951750 | 152964049 | 5099  | 4528  | 12.837425 |
| GJA1      | NM_000165 | chr6  | + | 121754743 | 121772874 | 1133  | 855   | 12.821655 |
| PTTG1     | NM_004219 | chr5  | + | 159846863 | 159857747 | 1102  | 766   | 12.80344  |
| PAAF1     | NM_025155 | chr11 | + | 73586031  | 73640780  | 2345  | 2330  | 12.788555 |
| TMPRSS11D | NM_004262 | chr4  | - | 68684592  | 68751717  | 725   | 560   | 12.787165 |
| PLEC      | NM_201384 | chr8  | - | 144987319 | 145015759 | 21187 | 20904 | 12.777195 |
| CEACAM3   | NM_001815 | chr19 | + | 42298532  | 42317592  | 1213  | 831   | 12.69175  |

|          |           |       |   |           |           |      |      |            |
|----------|-----------|-------|---|-----------|-----------|------|------|------------|
| KLK11    | NM_144947 | chr19 | - | 51523485  | 51532886  | 2850 | 2346 | 12.673705  |
| IL18     | NM_001562 | chr11 | - | 112011974 | 112036841 | 1408 | 1327 | 12.64669   |
| CXCL14   | NM_004887 | chr5  | - | 134904369 | 134916970 | 1862 | 1343 | 12.63403   |
| GNB2     | NM_005273 | chr7  | + | 100269361 | 100278793 | 6781 | 6754 | 12.63339   |
| TMEM11   | NM_003876 | chr17 | - | 21099261  | 21119909  | 4156 | 4100 | 12.631775  |
| HIATL1   | NM_032558 | chr9  | + | 97134831  | 97225203  | 3150 | 2808 | 12.61111   |
| RUSC1    | NM_014328 | chr1  | + | 155292216 | 155302910 | 3165 | 3154 | 12.59723   |
| ADRM1    | NM_175573 | chr20 | + | 60876025  | 60885919  | 8090 | 7388 | 12.5791175 |
| SLC25A4  | NM_001151 | chr4  | + | 186062415 | 186073539 | 1810 | 1592 | 12.55696   |
| SSFA2    | NM_006751 | chr2  | + | 182754470 | 182797465 | 1610 | 1510 | 12.520845  |
| APOBEC3C | NM_014508 | chr22 | + | 39408263  | 39416826  | 1807 | 1500 | 12.497715  |
| CD46     | NM_172361 | chr1  | + | 207923381 | 207970862 | 1947 | 1886 | 12.49447   |
| GJB3     | NM_024009 | chr1  | + | 35244788  | 35253966  | 5123 | 4559 | 12.491675  |
| DSG3     | NM_001944 | chr18 | + | 29025730  | 29060666  | 813  | 415  | 12.48767   |
| ENTPD3   | NM_001248 | chr3  | + | 40426671  | 40472111  | 1895 | 1016 | 12.46067   |
| DDT      | NM_001355 | chr22 | - | 24311552  | 24324020  | 2775 | 2420 | 12.448625  |
| NOP56    | NM_006392 | chr20 | + | 2631252   | 2641040   | 1952 | 1724 | 12.39722   |
| CXCL1    | NM_001511 | chr4  | + | 74733107  | 74738956  | 1774 | 1685 | 12.388935  |
| MFSD1    | NM_022736 | chr3  | + | 158517713 | 158549509 | 1494 | 1170 | 12.3856    |
| TSTA3    | NM_003313 | chr8  | - | 144692786 | 144701733 | 3460 | 3324 | 12.36481   |
| UCHL3    | NM_006002 | chr13 | + | 76121925  | 76182069  | 1929 | 1681 | 12.35968   |
| CST3     | NM_000099 | chr20 | - | 23612292  | 23620575  | 2195 | 1482 | 12.34836   |
| DSC2     | NM_024422 | chr18 | - | 28643940  | 28684389  | 2653 | 1907 | 12.3417    |
| PRMT2    | NM_206962 | chr21 | + | 48053525  | 48086864  | 4344 | 3842 | 12.323005  |

|           |              |       |   |           |           |      |      |             |
|-----------|--------------|-------|---|-----------|-----------|------|------|-------------|
| PKP2      | NM_004572    | chr12 | - | 32941678  | 33051781  | 2941 | 2156 | 12.287155   |
| PLBD1     | NM_024829    | chr12 | - | 14654595  | 14722792  | 2626 | 1302 | 12.27064    |
| TMEM30B   | NM_001017970 | chr14 | - | 61742087  | 61750531  | 1906 | 1428 | 12.264215   |
| NCCRP1    | NM_001001414 | chr19 | + | 39685602  | 39694523  | 2746 | 2559 | 12.2582     |
| SERINC1   | NM_020755    | chr6  | - | 122762491 | 122794953 | 835  | 807  | 12.256545   |
| TFCP2L1   | NM_014553    | chr2  | - | 121972162 | 122044779 | 4473 | 4160 | 12.22148    |
| IDH3B     | NM_174856    | chr20 | - | 2637039   | 2646844   | 1183 | 1063 | 12.21752    |
| SERPINB13 | NM_012397    | chr18 | + | 61252532  | 61268434  | 438  | 206  | 12.21259    |
| MSMB      | NM_138634    | chr10 | + | 51547551  | 51564593  | 1362 | 1228 | 12.1906675  |
| SMAD1     | NM_005900    | chr4  | + | 146400949 | 146482326 | 3596 | 3315 | 12.188885   |
| C20orf4   | NM_015511    | chr20 | + | 34822445  | 34846854  | 1497 | 1144 | 12.140885   |
| LMO4      | NM_006769    | chr1  | + | 87792149  | 87816608  | 5498 | 5470 | 12.138215   |
| ZNF562    | NM_017656    | chr19 | - | 9757336   | 9787777   | 1276 | 1132 | 12.133065   |
| DNM1L     | NM_012063    | chr12 | + | 32830135  | 32900585  | 1762 | 1484 | 12.11321667 |
| C12orf54  | NM_152319    | chr12 | + | 48874284  | 48892298  | 1185 | 370  | 12.10712    |
| DNASE2    | NM_001375    | chr19 | - | 12984023  | 12994336  | 2011 | 1908 | 12.104695   |
| SAAL1     | NM_138421    | chr11 | - | 18099888  | 18129639  | 972  | 811  | 12.060585   |
| FBNP1L    | NM_017737    | chr1  | + | 93911686  | 94022219  | 3834 | 2948 | 12.056625   |
| TCEAL3    | NM_032926    | chrX  | + | 102860832 | 102866856 | 1355 | 1073 | 12.0566075  |
| VSNL1     | NM_003385    | chr2  | + | 17719805  | 17839707  | 5240 | 4408 | 12.043515   |
| CLCA4     | NM_012128    | chr1  | + | 87010757  | 87048433  | 796  | 0    | 12.036785   |
| AGR2      | NM_006408    | chr7  | - | 16830262  | 16846739  | 1011 | 770  | 12.02685    |
| TUSC1     | NM_001004125 | chr9  | - | 25674385  | 25680857  | 1626 | 1538 | 12.025205   |
| INTS12    | NM_020395    | chr4  | - | 106601783 | 106631882 | 1274 | 1247 | 12.01615    |

|          |              |       |   |           |           |       |       |             |
|----------|--------------|-------|---|-----------|-----------|-------|-------|-------------|
| DNAJB14  | NM_001031723 | chr4  | - | 100818708 | 100869880 | 1471  | 1242  | 11.9846925  |
| PPIC     | NM_000943    | chr5  | - | 122357076 | 122374426 | 2166  | 2124  | 11.984645   |
| UPK1B    | NM_006952    | chr3  | + | 118890423 | 118926001 | 2239  | 1970  | 11.978865   |
| SESN3    | NM_144665    | chr11 | - | 94904131  | 94966247  | 1675  | 1274  | 11.97292    |
| PIGG     | NM_017733    | chr4  | + | 490987    | 535321    | 3501  | 2552  | 11.9697     |
| USO1     | NM_003715    | chr4  | + | 76647827  | 76737367  | 2079  | 1907  | 11.96663    |
| STEAP1   | NM_012449    | chr7  | + | 89781687  | 89796142  | 1454  | 1208  | 11.906755   |
| ZBED2    | NM_024508    | chr3  | - | 111309745 | 111316167 | 917   | 451   | 11.90485    |
| WDR41    | NM_018268    | chr5  | - | 76726067  | 76790333  | 1193  | 1161  | 11.90359    |
| MFSD2A   | NM_032793    | chr1  | + | 40418782  | 40437629  | 4321  | 3399  | 11.90122    |
| DIABLO   | NM_138929    | chr12 | - | 122690207 | 122714069 | 2009  | 1810  | 11.88122667 |
| ABCC10   | NM_033450    | chr6  | + | 43397487  | 43420164  | 2090  | 1711  | 11.870745   |
| YEATS4   | NM_006530    | chr12 | + | 69751530  | 69786577  | 1329  | 1220  | 11.80925    |
| PDCD2    | NM_144781    | chr6  | - | 170888833 | 170895749 | 1315  | 1217  | 11.79592    |
| IVNS1ABP | NM_006469    | chr1  | - | 185263520 | 185288462 | 2366  | 2181  | 11.79067    |
| RNPC3    | NM_017619    | chr1  | + | 104066576 | 104099860 | 1288  | 1234  | 11.771865   |
| NUDT16L1 | NM_032349    | chr16 | + | 4741692   | 4747861   | 5197  | 5125  | 11.76317    |
| PAPD4    | NM_173797    | chr5  | + | 78906241  | 78984472  | 1054  | 993   | 11.759015   |
| SMNDC1   | NM_005871    | chr10 | - | 112050796 | 112066708 | 1346  | 1309  | 11.74236    |
| CLTB     | NM_007097    | chr5  | - | 175817454 | 175845541 | 5076  | 4458  | 11.73723    |
| CDS1     | NM_001263    | chr4  | + | 85502055  | 85574494  | 3421  | 1627  | 11.728725   |
| PUF60    | NM_078480    | chr8  | - | 144896545 | 144913538 | 11762 | 11581 | 11.7271625  |
| BRMS1    | NM_015399    | chr11 | - | 66102802  | 66114583  | 4553  | 4206  | 11.722805   |
| C16orf42 | NM_001001410 | chr16 | - | 1397239   | 1403874   | 2226  | 1945  | 11.711785   |

|           |              |       |   |           |           |      |      |            |
|-----------|--------------|-------|---|-----------|-----------|------|------|------------|
| GPR109A   | NM_177551    | chr12 | - | 123183838 | 123189905 | 1157 | 996  | 11.703265  |
| GJB5      | NM_005268    | chr1  | + | 35218719  | 35226113  | 2322 | 1884 | 11.68649   |
| ARFGEF1   | NM_006421    | chr8  | - | 68107895  | 68257913  | 3290 | 3249 | 11.686335  |
| ACP2      | NM_001610    | chr11 | - | 47258851  | 47272458  | 1647 | 1518 | 11.682445  |
| GALE      | NM_001127621 | chr1  | - | 24120087  | 24128061  | 3696 | 3350 | 11.678335  |
| TMPRSS4   | NM_019894    | chr11 | + | 117945725 | 117992557 | 3226 | 2294 | 11.6690425 |
| CROT      | NM_021151    | chr7  | + | 86972949  | 87031113  | 1126 | 1082 | 11.664475  |
| HMG20B    | NM_006339    | chr19 | + | 3570941   | 3581082   | 4941 | 4537 | 11.663005  |
| TMEM68    | NM_152417    | chr8  | - | 56649318  | 56687886  | 1345 | 1202 | 11.60894   |
| REPIN1    | NM_014374    | chr7  | + | 150066256 | 150073134 | 3212 | 2978 | 11.60765   |
| RABEP1    | NM_004703    | chr17 | + | 5183556   | 5291133   | 2635 | 2465 | 11.60277   |
| TFPI2     | NM_006528    | chr7  | - | 93513743  | 93522066  | 1121 | 1086 | 11.590905  |
| GPR109B   | NM_006018    | chr12 | - | 123197301 | 123203440 | 1007 | 993  | 11.590215  |
| RAB32     | NM_006834    | chr6  | + | 146862826 | 146878087 | 2285 | 2097 | 11.582055  |
| CGGBP1    | NM_003663    | chr3  | - | 88099098  | 88110147  | 1661 | 1605 | 11.569585  |
| BAP1      | NM_004656    | chr3  | - | 52433023  | 52446010  | 3894 | 3599 | 11.55741   |
| TAB2      | NM_015093    | chr6  | + | 149637434 | 149734748 | 2425 | 2390 | 11.505655  |
| NMU       | NM_006681    | chr4  | - | 56459396  | 56504466  | 1925 | 1485 | 11.497885  |
| YIPF5     | NM_030799    | chr5  | - | 143535727 | 143552279 | 830  | 748  | 11.4961125 |
| A2ML1     | NM_144670    | chr12 | + | 8973148   | 9031378   | 1192 | 1019 | 11.48883   |
| GATAD1    | NM_021167    | chr7  | + | 92074763  | 92090743  | 1882 | 1665 | 11.47406   |
| DVL2      | NM_004422    | chr17 | - | 7126659   | 7139864   | 2159 | 1789 | 11.471365  |
| C14orf101 | NM_017799    | chr14 | + | 57044509  | 57118233  | 1352 | 1156 | 11.44763   |
| PPAPDC2   | NM_203453    | chr9  | + | 4660296   | 4667259   | 2480 | 2190 | 11.445525  |



|         |              |       |   |           |           |      |      |            |
|---------|--------------|-------|---|-----------|-----------|------|------|------------|
| AK3     | NM_016282    | chr9  | - | 4709156   | 4743228   | 2249 | 1762 | 11.434975  |
| HES2    | NM_019089    | chr1  | - | 6473292   | 6481980   | 5462 | 4937 | 11.42107   |
| MYST1   | NM_182958    | chr16 | + | 31126983  | 31144715  | 5055 | 4605 | 11.418885  |
| SLC35A5 | NM_017945    | chr3  | + | 112278893 | 112305004 | 1718 | 1649 | 11.39886   |
| LGALS9C | NM_001040078 | chr17 | + | 18378097  | 18400260  | 2113 | 1860 | 11.391385  |
| STUB1   | NM_005861    | chr16 | + | 728113    | 734769    | 4986 | 4567 | 11.39031   |
| MRPL23  | NM_021134    | chr11 | + | 1966500   | 1979840   | 6429 | 6422 | 11.372725  |
| ATRN    | NM_139322    | chr20 | + | 3449663   | 3598551   | 2646 | 2443 | 11.372185  |
| MMP10   | NM_002425    | chr11 | - | 102639231 | 102653360 | 691  | 436  | 11.37004   |
| PLEKHJ1 | NM_018049    | chr19 | - | 2231153   | 2238329   | 4951 | 4921 | 11.3586    |
| ENOPH1  | NM_021204    | chr4  | + | 83349724  | 83384245  | 3397 | 3227 | 11.35489   |
| MLLT10  | NM_004641    | chr10 | + | 21821099  | 22034560  | 4035 | 3948 | 11.35025   |
| ZNF498  | NM_145115    | chr7  | + | 99212569  | 99232031  | 2271 | 1541 | 11.344585  |
| PPBP    | NM_002704    | chr4  | - | 74850154  | 74855908  | 163  | 0    | 11.335625  |
| CPEB2   | NM_182646    | chr4  | + | 15002296  | 15073778  | 4187 | 4130 | 11.307885  |
| PIGO    | NM_152850    | chr9  | - | 35086686  | 35098580  | 1024 | 988  | 11.2829875 |
| ARL4C   | NM_005737    | chr2  | - | 235399684 | 235407694 | 3770 | 3179 | 11.280385  |
| ARHGAP8 | NM_181335    | chr22 | + | 45146436  | 45260665  | 6472 | 5105 | 11.27462   |
| FANCL   | NM_018062    | chr2  | - | 58384376  | 58470516  | 869  | 868  | 11.26252   |
| NAPG    | NM_003826    | chr18 | + | 10523871  | 10554767  | 1382 | 1323 | 11.24886   |
| SNX7    | NM_152238    | chr1  | + | 99125234  | 99228057  | 2528 | 2337 | 11.247565  |
| NR4A2   | NM_006186    | chr2  | - | 157178942 | 157191288 | 2922 | 2852 | 11.23115   |
| RNF146  | NM_030963    | chr6  | + | 127586018 | 127611505 | 1674 | 1525 | 11.22947   |
| CSTA    | NM_005213    | chr3  | + | 122042009 | 122062816 | 594  | 0    | 11.220925  |

|          |           |       |   |           |           |      |      |             |
|----------|-----------|-------|---|-----------|-----------|------|------|-------------|
| MINA     | NM_153182 | chr3  | - | 97658659  | 97693296  | 1420 | 1316 | 11.2177725  |
| ARNTL2   | NM_020183 | chr12 | + | 27483986  | 27575467  | 4813 | 3994 | 11.21116    |
| WDR43    | NM_015131 | chr2  | + | 29115531  | 29173081  | 2376 | 1767 | 11.20869    |
| KLK13    | NM_015596 | chr19 | - | 51557461  | 51570368  | 572  | 537  | 11.204115   |
| RRM2B    | NM_015713 | chr8  | - | 103214727 | 103253347 | 1844 | 1694 | 11.203575   |
| GAS2L1   | NM_152237 | chr22 | + | 29700995  | 29710775  | 8465 | 8346 | 11.18762333 |
| DALRD3   | NM_018114 | chr3  | - | 49050433  | 49060468  | 4721 | 4588 | 11.140315   |
| PLS1     | NM_002670 | chr3  | + | 142340264 | 142434506 | 940  | 706  | 11.12484    |
| PSG9     | NM_002784 | chr19 | - | 43755433  | 43775683  | 580  | 345  | 11.11606    |
| SIX2     | NM_016932 | chr2  | - | 45230322  | 45238543  | 6909 | 6402 | 11.10281    |
| C10orf57 | NM_025125 | chr10 | + | 81836424  | 81854308  | 1713 | 1245 | 11.099945   |
| LDOC1L   | NM_032287 | chr22 | - | 44886448  | 44896006  | 1669 | 1616 | 11.08344    |
| C20orf11 | NM_017896 | chr20 | + | 61567439  | 61581828  | 2218 | 2049 | 11.078215   |
| MORC2    | NM_014941 | chr22 | - | 31320598  | 31366188  | 2924 | 2326 | 11.076065   |
| SLC15A2  | NM_021082 | chr3  | + | 121611169 | 121665035 | 1090 | 259  | 11.0742     |
| CCDC111  | NM_152683 | chr4  | + | 185568765 | 185618113 | 2535 | 2282 | 11.06678    |
| FAM160B2 | NM_022749 | chr8  | + | 21944712  | 21963892  | 6591 | 5660 | 11.06086    |
| MRPL27   | NM_016504 | chr17 | - | 48443226  | 48452563  | 979  | 972  | 11.00685833 |
| SPINK5   | NM_006846 | chr5  | + | 147441533 | 147518926 | 248  | 107  | 10.97009    |
| ZNF414   | NM_032370 | chr19 | - | 8574214   | 8581049   | 3352 | 3161 | 10.95982    |
| MOBK12C  | NM_201403 | chr1  | - | 47071385  | 47084564  | 3018 | 3015 | 10.953505   |
| GJB6     | NM_006783 | chr13 | - | 20794099  | 20807373  | 2008 | 1530 | 10.946035   |
| IRX2     | NM_033267 | chr5  | - | 2744277   | 2753770   | 6808 | 5987 | 10.9399     |
| LNX2     | NM_153371 | chr13 | - | 28118048  | 28196721  | 4105 | 3986 | 10.93573    |

|          |           |       |   |           |           |      |      |             |
|----------|-----------|-------|---|-----------|-----------|------|------|-------------|
| ZNF589   | NM_016089 | chr3  | + | 48280594  | 48314480  | 2880 | 2395 | 10.92373    |
| YEATS2   | NM_018023 | chr3  | + | 183413604 | 183532414 | 3500 | 3339 | 10.894635   |
| CECR5    | NM_033070 | chr22 | - | 17616408  | 17642170  | 2179 | 1925 | 10.89274    |
| C19orf24 | NM_017914 | chr19 | + | 1273518   | 1281244   | 4908 | 3777 | 10.888385   |
| VGLL1    | NM_016267 | chrX  | + | 135612309 | 135640967 | 271  | 0    | 10.86132    |
| ZNF398   | NM_170686 | chr7  | + | 148842558 | 148882119 | 2467 | 2099 | 10.856575   |
| CRCT1    | NM_019060 | chr1  | + | 152484976 | 152490482 | 1613 | 1057 | 10.83777    |
| FAM35A   | NM_019054 | chr10 | + | 88852951  | 88953223  | 2292 | 2198 | 10.833905   |
| ENSA     | NM_207168 | chr1  | - | 150597520 | 150604099 | 1123 | 1021 | 10.83251167 |
| KCNJ5    | NM_000890 | chr11 | + | 128759311 | 128789952 | 6138 | 5891 | 10.83195    |
| SNAPC2   | NM_003083 | chr19 | + | 7983192   | 7990137   | 3767 | 3335 | 10.79973    |
| ENDOG    | NM_004435 | chr9  | + | 131578777 | 131586956 | 3057 | 3050 | 10.799005   |
| C9orf85  | NM_182505 | chr9  | + | 74524421  | 74590372  | 2543 | 2484 | 10.798225   |
| LCE3E    | NM_178435 | chr1  | - | 152536128 | 152541249 | 639  | 394  | 10.77159    |
| FBXW5    | NM_018998 | chr9  | - | 139832885 | 139841174 | 4413 | 3740 | 10.74843333 |
| DLK2     | NM_206539 | chr6  | - | 43416088  | 43425787  | 3562 | 2399 | 10.734435   |
| THSD1    | NM_199263 | chr13 | - | 52949301  | 52982630  | 1185 | 1065 | 10.72583    |
| EID2     | NM_153232 | chr19 | - | 40027445  | 40032839  | 1342 | 1263 | 10.71709    |
| ZNF426   | NM_024106 | chr19 | - | 9636679   | 9651304   | 1392 | 933  | 10.71308    |
| KRT24    | NM_019016 | chr17 | - | 38852241  | 38862003  | 812  | 0    | 10.709845   |
| ANKRD9   | NM_152326 | chr14 | - | 102971196 | 102978129 | 6060 | 5671 | 10.70912    |
| SPATA5L1 | NM_024063 | chr15 | + | 45692517  | 45715617  | 1946 | 1893 | 10.687095   |
| RNF39    | NM_170769 | chr6  | - | 30036041  | 30045627  | 2732 | 2715 | 10.686155   |
| FOXE1    | NM_004473 | chr9  | + | 100613535 | 100620998 | 3882 | 3579 | 10.67052    |

|          |              |       |   |           |           |      |      |           |
|----------|--------------|-------|---|-----------|-----------|------|------|-----------|
| C3orf78  | NM_001124767 | chr3  | + | 52568619  | 52576587  | 2128 | 2043 | 10.660745 |
| IRS2     | NM_003749    | chr13 | - | 110404182 | 110440915 | 7527 | 6111 | 10.65387  |
| FOXD1    | NM_004472    | chr5  | - | 72740083  | 72746353  | 2357 | 2253 | 10.64131  |
| JMJD8    | NM_001005920 | chr16 | - | 729665    | 736440    | 4911 | 4202 | 10.636545 |
| PROS1    | NM_000313    | chr3  | - | 93589879  | 93694935  | 1914 | 1642 | 10.591775 |
| C12orf41 | NM_017822    | chr12 | - | 49044993  | 49078036  | 1239 | 1207 | 10.58853  |
| JOSD2    | NM_138334    | chr19 | - | 51007257  | 51016346  | 3671 | 3516 | 10.56813  |
| APOBEC3B | NM_004900    | chr22 | + | 39376403  | 39390784  | 3639 | 3451 | 10.560305 |
| QPCT     | NM_012413    | chr2  | + | 37569751  | 37602466  | 2547 | 2502 | 10.55911  |
| CNDP2    | NM_018235    | chr18 | + | 72161498  | 72192690  | 3758 | 3291 | 10.54087  |
| C11orf93 | NM_001136105 | chr11 | + | 111167974 | 111181354 | 2078 | 1835 | 10.535725 |
| SLC25A17 | NM_006358    | chr22 | - | 41163637  | 41217393  | 1213 | 1099 | 10.52902  |
| NR2C1    | NM_003297    | chr12 | - | 95412056  | 95469405  | 1286 | 1241 | 10.511385 |
| OSTM1    | NM_014028    | chr6  | - | 108360611 | 108397942 | 2225 | 2022 | 10.5068   |
| LRRN1    | NM_020873    | chr3  | + | 3839119   | 3891388   | 2417 | 1313 | 10.49871  |
| LCE1E    | NM_178353    | chr1  | + | 152756751 | 152762902 | 448  | 220  | 10.4987   |
| DCLRE1A  | NM_014881    | chr10 | - | 115592482 | 115615860 | 1831 | 1676 | 10.487165 |
| PRPF39   | NM_017922    | chr14 | + | 45551300  | 45586805  | 1526 | 1310 | 10.480015 |
| PKIB     | NM_181795    | chr6  | + | 122929375 | 123049519 | 2592 | 1480 | 10.452605 |
| CHMP4C   | NM_152284    | chr8  | + | 82642686  | 82673749  | 1498 | 1171 | 10.414445 |
| GJD3     | NM_152219    | chr17 | - | 38514903  | 38522946  | 4149 | 3681 | 10.40955  |
| RAB27B   | NM_004163    | chr18 | + | 52493838  | 52559212  | 1612 | 1382 | 10.400955 |
| C9orf69  | NM_152833    | chr9  | - | 139004425 | 139012732 | 3906 | 2958 | 10.397455 |
| NDUFA4L2 | NM_020142    | chr12 | - | 57626684  | 57636476  | 5769 | 5356 | 10.373    |

|          |              |       |   |           |           |      |      |            |
|----------|--------------|-------|---|-----------|-----------|------|------|------------|
| SERAC1   | NM_032861    | chr6  | - | 158528534 | 158591313 | 2444 | 2237 | 10.348165  |
| LCE1C    | NM_178351    | chr1  | - | 152775309 | 152781108 | 489  | 0    | 10.34552   |
| ABCC5    | NM_005688    | chr3  | - | 183635722 | 183737728 | 3681 | 3479 | 10.341125  |
| PCSK5    | NM_006200    | chr9  | + | 78503558  | 78810347  | 5967 | 5287 | 10.31702   |
| SPRY1    | NM_199327    | chr4  | + | 124315954 | 124326908 | 3195 | 2764 | 10.3036125 |
| CTXN1    | NM_206833    | chr19 | - | 7987379   | 7993052   | 3689 | 2382 | 10.29321   |
| C1orf59  | NM_144584    | chr1  | - | 109188908 | 109206149 | 1495 | 1426 | 10.280945  |
| DMRT2    | NM_181872    | chr9  | + | 1048618   | 1059555   | 3407 | 2960 | 10.27857   |
| HLA-G    | NM_002127    | chr6  | + | 29792754  | 29800900  | 322  | 199  | 10.273635  |
| THAP1    | NM_199003    | chr8  | - | 42689815  | 42700475  | 1584 | 1512 | 10.271085  |
| HPS6     | NM_024747    | chr10 | + | 103823145 | 103829794 | 2105 | 1772 | 10.268285  |
| FAM83B   | NM_001010872 | chr6  | + | 54709567  | 54808820  | 3801 | 2982 | 10.261605  |
| POGLUT1  | NM_152305    | chr3  | + | 119185783 | 119215555 | 1363 | 1191 | 10.257365  |
| FAM84A   | NM_145175    | chr2  | + | 14770808  | 14782169  | 3726 | 2975 | 10.249965  |
| SLC12A2  | NM_001046    | chr5  | + | 127417481 | 127527381 | 3015 | 2938 | 10.243415  |
| ZNF135   | NM_007134    | chr19 | + | 58568605  | 58583111  | 1329 | 1172 | 10.2424    |
| DENND2C  | NM_198459    | chr1  | - | 115125194 | 115214733 | 2848 | 1763 | 10.231145  |
| VPS36    | NM_016075    | chr13 | - | 52984735  | 53026764  | 2605 | 2468 | 10.23045   |
| SOX2     | NM_003106    | chr3  | + | 181427720 | 181434224 | 4426 | 2263 | 10.22905   |
| SMARCAD1 | NM_020159    | chr4  | + | 95127014  | 95214444  | 1085 | 933  | 10.212175  |
| ABCA12   | NM_173076    | chr2  | - | 215794264 | 216005152 | 2682 | 2524 | 10.18816   |
| TBRG4    | NM_199122    | chr7  | - | 45137697  | 45153318  | 1816 | 1685 | 10.181765  |
| SDR16C5  | NM_138969    | chr8  | - | 57210568  | 57235242  | 1845 | 1247 | 10.178005  |
| IRX5     | NM_005853    | chr16 | + | 54963109  | 54970396  | 6373 | 5424 | 10.16918   |

|          |              |       |   |           |           |       |       |           |
|----------|--------------|-------|---|-----------|-----------|-------|-------|-----------|
| AGAP9    | NM_001190810 | chr10 | + | 48213722  | 48239509  | 243   | 0     | 10.160345 |
| TRIM68   | NM_018073    | chr11 | - | 4617900   | 4631438   | 1418  | 1081  | 10.154115 |
| BARX2    | NM_003658    | chr11 | + | 129243879 | 129324175 | 4196  | 2205  | 10.142245 |
| GINS3    | NM_022770    | chr16 | + | 58424296  | 58442049  | 1387  | 1348  | 10.09046  |
| MSL2     | NM_018133    | chr3  | - | 135865758 | 135916689 | 3190  | 2919  | 10.089925 |
| PTPRZ1   | NM_002851    | chr7  | + | 121511157 | 121704091 | 3047  | 2018  | 10.08715  |
| C1orf190 | NM_001013615 | chr1  | + | 46667004  | 46688929  | 2836  | 2665  | 10.085325 |
| LY6G6C   | NM_025261    | chr6  | - | 31684423  | 31691511  | 1402  | 643   | 10.068535 |
| PLEKHN1  | NM_032129    | chr1  | + | 899875    | 912485    | 5408  | 5150  | 10.063765 |
| KLF16    | NM_031918    | chr19 | - | 1850396   | 1865565   | 12282 | 12221 | 10.05217  |
| LZTS2    | NM_032429    | chr10 | + | 102754963 | 102769588 | 7213  | 6707  | 10.024915 |
| RNPEPL1  | NM_018226    | chr2  | + | 241506102 | 241520144 | 4901  | 4705  | 10.01952  |
| CYP4X1   | NM_178033    | chr1  | + | 47487238  | 47518424  | 1194  | 937   | 10.003795 |
| SOCS4    | NM_199421    | chr14 | + | 55491842  | 55518207  | 1271  | 1180  | 9.995595  |
| TMEM80   | NM_174940    | chr11 | + | 693614    | 706130    | 4547  | 4353  | 9.98517   |
| BMPR1B   | NM_001203    | chr4  | + | 95677126  | 96081602  | 5372  | 3368  | 9.983985  |
| SLC16A9  | NM_194298    | chr10 | - | 61408520  | 61471650  | 2921  | 1968  | 9.98083   |
| SAP30    | NM_003864    | chr4  | + | 174290091 | 174300684 | 2645  | 2608  | 9.965805  |
| CKAP2    | NM_018204    | chr13 | + | 53027493  | 53052764  | 1658  | 1637  | 9.9657    |
| UCK1     | NM_031432    | chr9  | - | 134397181 | 134408663 | 4157  | 3791  | 9.960145  |
| CCDC3    | NM_031455    | chr10 | - | 12936623  | 13045705  | 3395  | 2456  | 9.942935  |
| FAM110C  | NM_001077710 | chr2  | - | 36812     | 48589     | 3309  | 3037  | 9.94275   |
| KRT31    | NM_002277    | chr17 | - | 39547975  | 39555845  | 992   | 240   | 9.941685  |
| RFX7     | NM_022841    | chr15 | - | 56380729  | 56537484  | 2442  | 2313  | 9.94161   |

|         |              |       |   |           |           |       |       |          |
|---------|--------------|-------|---|-----------|-----------|-------|-------|----------|
| TYSND1  | NM_173555    | chr10 | - | 71895731  | 71908497  | 2902  | 2795  | 9.92802  |
| ZNF654  | NM_018293    | chr3  | + | 88186260  | 88195815  | 235   | 220   | 9.923455 |
| DACT2   | NM_214462    | chr6  | - | 168705582 | 168722403 | 2479  | 2356  | 9.91734  |
| PRR21   | NM_001080835 | chr2  | - | 240979228 | 240984400 | 474   | 0     | 9.89413  |
| SPSB3   | NM_080861    | chr16 | - | 1824711   | 1834582   | 7105  | 4184  | 9.87558  |
| NUP62CL | NM_017681    | chrX  | - | 106364655 | 106451671 | 1868  | 1589  | 9.87353  |
| USP43   | NM_153210    | chr17 | + | 9546948   | 9635004   | 5730  | 5597  | 9.86906  |
| SOX21   | NM_007084    | chr13 | - | 95359877  | 95366390  | 4749  | 4367  | 9.847125 |
| DEPDC7  | NM_139160    | chr11 | + | 33035726  | 33057129  | 1166  | 1053  | 9.845615 |
| SIPA1L2 | NM_020808    | chr1  | - | 232531710 | 232653244 | 1978  | 1568  | 9.838925 |
| TREM2   | NM_018965    | chr6  | - | 41124244  | 41132923  | 271   | 176   | 9.83238  |
| KLHL17  | NM_198317    | chr1  | + | 893965    | 903100    | 6692  | 6585  | 9.82833  |
| NDUFB3  | NM_002491    | chr2  | + | 201934460 | 201952474 | 1198  | 1072  | 9.827385 |
| CARD17  | NM_001007232 | chr11 | - | 104961194 | 104974159 | 138   | 0     | 9.817725 |
| CEP57L1 | NM_173830    | chr6  | + | 109448505 | 109487116 | 350   | 329   | 9.81236  |
| ASF1A   | NM_014034    | chr6  | + | 119213239 | 119232336 | 2296  | 2279  | 9.808815 |
| CAPS    | NM_080590    | chr19 | + | 5912191   | 5918223   | 2189  | 2067  | 9.79182  |
| SLC7A4  | NM_004173    | chr22 | - | 21381005  | 21388848  | 1326  | 1199  | 9.78683  |
| MSGN1   | NM_001105569 | chr2  | + | 17995784  | 18000368  | 536   | 346   | 9.77404  |
| BCL11B  | NM_138576    | chr14 | - | 99633623  | 99739823  | 17582 | 16688 | 9.765045 |
| NEDD1   | NM_152905    | chr12 | + | 97298999  | 97349470  | 1675  | 1561  | 9.75054  |
| TPSB2   | NM_024164    | chr16 | - | 1276334   | 1282186   | 2958  | 2748  | 9.714775 |
| SIRPB2  | NM_001134836 | chr20 | - | 1453234   | 1474234   | 1821  | 1081  | 9.707925 |
| SPCS3   | NM_021928    | chr4  | + | 177239088 | 177255397 | 1603  | 1317  | 9.688255 |

|           |              |       |   |           |           |       |       |          |
|-----------|--------------|-------|---|-----------|-----------|-------|-------|----------|
| EXOSC5    | NM_020158    | chr19 | - | 41890274  | 41905257  | 1497  | 1213  | 9.652285 |
| SPRR3     | NM_005416    | chr1  | + | 152972221 | 152978333 | 431   | 0     | 9.651565 |
| CCNA1     | NM_003914    | chr13 | + | 37004407  | 37019020  | 1424  | 1292  | 9.648305 |
| TP53AIP1  | NM_022112    | chr11 | - | 128803268 | 128815295 | 3641  | 1912  | 9.63656  |
| CCDC138   | NM_144978    | chr2  | + | 109401217 | 109494848 | 1503  | 1213  | 9.62468  |
| TREM1     | NM_018643    | chr6  | - | 41241710  | 41256458  | 756   | 737   | 9.612575 |
| CHAC1     | NM_024111    | chr15 | + | 41243634  | 41250718  | 2914  | 2669  | 9.60963  |
| TTBK2     | NM_173500    | chr15 | - | 43034540  | 43215008  | 2890  | 2793  | 9.59962  |
| SMPD1     | NM_001007593 | chr11 | + | 6409642   | 6418229   | 1351  | 1275  | 9.584655 |
| MED30     | NM_080651    | chr8  | + | 118530963 | 118554502 | 1005  | 906   | 9.579155 |
| SMOC2     | NM_022138    | chr6  | + | 168839829 | 169070675 | 12648 | 11698 | 9.56561  |
| NXT2      | NM_018698    | chrX  | + | 108777008 | 108789914 | 1499  | 1289  | 9.550125 |
| C12orf29  | NM_001009894 | chr12 | + | 88427266  | 88445938  | 959   | 901   | 9.548995 |
| SERTAD3   | NM_203344    | chr19 | - | 40944746  | 40952283  | 2633  | 2448  | 9.545135 |
| CHL1      | NM_006614    | chr3  | + | 236648    | 453098    | 3559  | 2383  | 9.53591  |
| KRTAP10-2 | NM_198693    | chr21 | - | 45968316  | 45973389  | 2276  | 1191  | 9.51689  |
| WDR54     | NM_032118    | chr2  | + | 74646883  | 74654883  | 2739  | 1924  | 9.51029  |
| C3orf63   | NM_015224    | chr3  | - | 56652158  | 56700075  | 266   | 253   | 9.49665  |
| ZNF626    | NM_145297    | chr19 | - | 20825507  | 20846403  | 814   | 756   | 9.49131  |
| ZMYM5     | NM_001142684 | chr13 | - | 20395622  | 20439777  | 3627  | 3487  | 9.490745 |
| FBN2      | NM_001999    | chr5  | - | 127591599 | 127875736 | 3880  | 3066  | 9.449785 |
| BBOX1     | NM_003986    | chr11 | + | 27060507  | 27151355  | 1143  | 1143  | 9.43296  |
| RNF222    | NM_001146684 | chr17 | - | 8292021   | 8303145   | 1608  | 1367  | 9.428305 |
| TMPRSS11F | NM_207407    | chr4  | - | 68916914  | 68997588  | 1027  | 0     | 9.422205 |



|          |              |       |   |           |           |      |      |           |
|----------|--------------|-------|---|-----------|-----------|------|------|-----------|
| SUSD4    | NM_017982    | chr1  | - | 223392159 | 223539545 | 5820 | 5685 | 9.419095  |
| ACVR2A   | NM_001616    | chr2  | + | 148600568 | 148690394 | 2410 | 2233 | 9.401385  |
| DRD2     | NM_016574    | chr11 | - | 113278315 | 113348002 | 4930 | 3928 | 9.39099   |
| ZC3H8    | NM_032494    | chr2  | - | 112971437 | 113014665 | 1376 | 905  | 9.381055  |
| ZNF606   | NM_025027    | chr19 | - | 58486439  | 58516715  | 1549 | 1431 | 9.36385   |
| HTR7     | NM_019860    | chr10 | - | 92498574  | 92619672  | 4865 | 4210 | 9.355475  |
| MPST     | NM_021126    | chr22 | + | 37413700  | 37427864  | 4202 | 4089 | 9.35158   |
| SERF1A   | NM_022968    | chr5  | + | 69319070  | 69330526  | 939  | 799  | 9.34901   |
| CCDC113  | NM_014157    | chr16 | + | 58281838  | 58319735  | 2495 | 1614 | 9.343995  |
| STOX2    | NM_020225    | chr4  | + | 184824507 | 184940876 | 4655 | 4406 | 9.341645  |
| MUC16    | NM_024690    | chr19 | - | 8957518   | 9094019   | 637  | 297  | 9.341315  |
| C4orf19  | NM_018302    | chr4  | + | 37583853  | 37597133  | 243  | 138  | 9.335395  |
| CCDC66   | NM_001141947 | chr3  | + | 56589182  | 56657849  | 1079 | 1019 | 9.330405  |
| C20orf46 | NM_018354    | chr20 | - | 1159213   | 1167118   | 2644 | 2576 | 9.326765  |
| UBL4B    | NM_203412    | chr1  | + | 110653060 | 110658570 | 464  | 259  | 9.324015  |
| ADAM28   | NM_021777    | chr8  | + | 24149578  | 24195613  | 427  | 341  | 9.3238925 |
| NLGN4X   | NM_181332    | chrX  | - | 5806081   | 6148707   | 5145 | 4359 | 9.301035  |
| CAPN6    | NM_014289    | chrX  | - | 110486325 | 110515775 | 680  | 591  | 9.281865  |
| ZFP42    | NM_174900    | chr4  | + | 188914923 | 188928200 | 840  | 756  | 9.27113   |
| SATB1    | NM_002971    | chr3  | - | 18387132  | 18468830  | 1614 | 1607 | 9.26758   |
| CYP2J2   | NM_000775    | chr1  | - | 60356978  | 60394424  | 710  | 590  | 9.265115  |
| ZFP28    | NM_020828    | chr19 | + | 57048315  | 57070171  | 1693 | 1591 | 9.259765  |
| NEK3     | NM_001146099 | chr13 | - | 52704777  | 52735997  | 1177 | 1150 | 9.25709   |
| SREK1IP1 | NM_173829    | chr5  | - | 64011976  | 64066497  | 1003 | 989  | 9.245685  |

|         |              |       |   |           |           |      |      |           |
|---------|--------------|-------|---|-----------|-----------|------|------|-----------|
| LPCAT2  | NM_017839    | chr16 | + | 55540911  | 55622583  | 1944 | 1264 | 9.245245  |
| PSG5    | NM_002781    | chr19 | - | 43669893  | 43692689  | 691  | 591  | 9.241305  |
| ZNF211  | NM_198855    | chr19 | + | 58142533  | 58156148  | 1003 | 946  | 9.23055   |
| IL1RL1  | NM_016232    | chr2  | + | 102925960 | 102970498 | 1194 | 892  | 9.2186825 |
| TSSC4   | NM_005706    | chr11 | + | 2421521   | 2427107   | 2398 | 1940 | 9.20646   |
| MBOAT2  | NM_138799    | chr2  | - | 8994699   | 9145877   | 3881 | 3433 | 9.199095  |
| DAPL1   | NM_001017920 | chr2  | + | 159649827 | 159674497 | 917  | 792  | 9.17009   |
| PHPT1   | NM_014172    | chr9  | + | 139741254 | 139747491 | 4976 | 4320 | 9.167215  |
| DYRK1B  | NM_006484    | chr19 | - | 40313988  | 40326842  | 4723 | 4507 | 9.16566   |
| MAPK8   | NM_139049    | chr10 | + | 49607685  | 49645184  | 682  | 211  | 9.142105  |
| BAZ2B   | NM_013450    | chr2  | - | 160173488 | 160475060 | 3414 | 3319 | 9.12264   |
| PROL1   | NM_021225    | chr4  | + | 71261597  | 71277915  | 100  | 0    | 9.11901   |
| RPUSD1  | NM_058192    | chr16 | - | 832972    | 840384    | 6226 | 5488 | 9.098555  |
| ZNF22   | NM_006963    | chr10 | + | 45494271  | 45502778  | 1949 | 1762 | 9.09407   |
| PELI1   | NM_020651    | chr2  | - | 64317784  | 64373606  | 1851 | 1786 | 9.087135  |
| RNMTL1  | NM_018146    | chr17 | + | 683511    | 697742    | 4204 | 2915 | 9.08262   |
| TTC36   | NM_001080441 | chr11 | + | 118396208 | 118403741 | 2340 | 2214 | 9.072245  |
| HRASLS  | NM_020386    | chr3  | + | 192956916 | 192990645 | 1053 | 860  | 9.05415   |
| NAP1L2  | NM_021963    | chrX  | - | 72430152  | 72436685  | 584  | 579  | 9.04906   |
| LIG4    | NM_206937    | chr13 | - | 108857790 | 108869883 | 1454 | 1424 | 9.04767   |
| CD274   | NM_014143    | chr9  | + | 5448501   | 5472568   | 1327 | 1239 | 9.04725   |
| OSBPL6  | NM_145739    | chr2  | + | 179182969 | 179262876 | 655  | 357  | 9.04609   |
| FAM183A | NM_001101376 | chr1  | + | 43611592  | 43624068  | 1038 | 600  | 9.03901   |
| ZNF551  | NM_138347    | chr19 | + | 58191355  | 58203170  | 1016 | 1002 | 9.032465  |

|          |              |       |   |           |           |      |      |          |
|----------|--------------|-------|---|-----------|-----------|------|------|----------|
| C2orf85  | NM_173821    | chr2  | + | 242809884 | 242817483 | 4552 | 4420 | 9.02815  |
| RAD52    | NM_134424    | chr12 | - | 1019253   | 1060864   | 2222 | 1911 | 9.02462  |
| KPRP     | NM_001025231 | chr1  | + | 152728504 | 152736530 | 1023 | 135  | 9.02005  |
| ATOH1    | NM_005172    | chr4  | + | 94748076  | 94753143  | 1599 | 928  | 9.01169  |
| CYP4B1   | NM_001099772 | chr1  | + | 47262668  | 47287022  | 507  | 82   | 8.98142  |
| ZNF662   | NM_207404    | chr3  | + | 42945400  | 42962826  | 1080 | 913  | 8.97512  |
| NKX6-1   | NM_006168    | chr4  | - | 85412434  | 85421388  | 4015 | 3898 | 8.97485  |
| C22orf26 | NM_018280    | chr22 | - | 46444337  | 46452025  | 3994 | 3962 | 8.9692   |
| ODF2L    | NM_020729    | chr1  | - | 86813775  | 86864026  | 1344 | 1227 | 8.956075 |
| PATZ1    | NM_032052    | chr22 | - | 31719788  | 31744250  | 6391 | 6329 | 8.955265 |
| FOXA2    | NM_153675    | chr20 | - | 22559640  | 22568102  | 4765 | 4675 | 8.95196  |
| MRPS34   | NM_023936    | chr16 | - | 1819894   | 1825141   | 5188 | 4799 | 8.95044  |
| EYA1     | NM_172060    | chr8  | - | 72107666  | 72270980  | 2118 | 1240 | 8.94867  |
| CGB8     | NM_033183    | chr19 | - | 49548893  | 49554369  | 538  | 501  | 8.94105  |
| MRGPRX3  | NM_054031    | chr11 | + | 18140500  | 18162028  | 396  | 0    | 8.940185 |
| FAIM     | NM_018147    | chr3  | + | 138325917 | 138354214 | 1969 | 1810 | 8.936795 |
| DGCR14   | NM_022719    | chr22 | - | 19115790  | 19134191  | 2900 | 2276 | 8.926185 |
| FLG      | NM_002016    | chr1  | - | 152272649 | 152299680 | 186  | 0    | 8.923855 |
| FUT4     | NM_002033    | chr11 | + | 94275015  | 94285065  | 2681 | 2075 | 8.9159   |
| LY6K     | NM_017527    | chr8  | + | 143779527 | 143787585 | 2145 | 2056 | 8.91484  |
| IRX3     | NM_024336    | chr16 | - | 54315210  | 54322379  | 5892 | 5590 | 8.904885 |
| GLRB     | NM_001166061 | chr4  | + | 157995275 | 158095243 | 1727 | 1481 | 8.904145 |
| CGB5     | NM_033043    | chr19 | + | 49545100  | 49550569  | 341  | 323  | 8.901765 |
| ISL1     | NM_002202    | chr5  | + | 50676956  | 50692564  | 3648 | 2215 | 8.86956  |

|           |              |       |   |           |           |      |      |          |
|-----------|--------------|-------|---|-----------|-----------|------|------|----------|
| A2M       | NM_000014    | chr12 | - | 9218302   | 9270559   | 252  | 0    | 8.855895 |
| CCDC34    | NM_080654    | chr11 | - | 27368417  | 27386796  | 1058 | 935  | 8.855225 |
| PRKCQ     | NM_006257    | chr10 | - | 6467103   | 6624239   | 3179 | 3037 | 8.85415  |
| NOL12     | NM_024313    | chr22 | + | 38080342  | 38091486  | 2187 | 1534 | 8.840565 |
| FAM150A   | NM_207413    | chr8  | - | 53444595  | 53480022  | 2102 | 1798 | 8.81972  |
| LENG9     | NM_198988    | chr19 | - | 54970977  | 54976895  | 4398 | 4141 | 8.81879  |
| LILRA4    | NM_012276    | chr19 | - | 54842690  | 54852422  | 182  | 161  | 8.815315 |
| CCDC8     | NM_032040    | chr19 | - | 46911584  | 46918920  | 1446 | 1043 | 8.798635 |
| APLNR     | NM_005161    | chr11 | - | 56999050  | 57006928  | 225  | 0    | 8.777    |
| ZNF524    | NM_153219    | chr19 | + | 56109728  | 56116505  | 3375 | 3252 | 8.768765 |
| FLRT2     | NM_013231    | chr14 | + | 85994486  | 86096271  | 5407 | 4832 | 8.764455 |
| C20orf141 | NM_080739    | chr20 | + | 2793655   | 2798477   | 1283 | 1086 | 8.76127  |
| POF1B     | NM_024921    | chrX  | - | 84530393  | 84636749  | 506  | 165  | 8.753825 |
| ZNF789    | NM_213603    | chr7  | + | 99068513  | 99087218  | 1483 | 1432 | 8.74977  |
| ACN9      | NM_020186    | chr7  | + | 96743903  | 96813076  | 1835 | 1438 | 8.727795 |
| SLC2A12   | NM_145176    | chr6  | - | 134306717 | 134375790 | 1823 | 1686 | 8.72735  |
| CBLN3     | NM_001039771 | chr14 | - | 24893738  | 24900732  | 3926 | 3829 | 8.7207   |
| ZNF470    | NM_001001668 | chr19 | + | 57076888  | 57096263  | 1119 | 1112 | 8.71214  |
| KLK9      | NM_012315    | chr19 | - | 51503767  | 51514891  | 2337 | 2192 | 8.706975 |
| ASPDH     | NM_001114598 | chr19 | - | 51012855  | 51019143  | 5288 | 5229 | 8.6999   |
| SLC6A15   | NM_182767    | chr12 | - | 85251265  | 85308607  | 1559 | 1457 | 8.691775 |
| CYP4V2    | NM_207352    | chr4  | + | 187110672 | 187136618 | 2773 | 2638 | 8.68791  |
| TCEAL2    | NM_080390    | chrX  | + | 101378658 | 101384685 | 1515 | 1457 | 8.682865 |
| CHST9     | NM_031422    | chr18 | - | 24493593  | 24767290  | 3623 | 2887 | 8.67163  |

|          |              |       |   |           |           |      |      |           |
|----------|--------------|-------|---|-----------|-----------|------|------|-----------|
| ZNF433   | NM_001080411 | chr19 | - | 12123530  | 12148526  | 1153 | 1036 | 8.671205  |
| CHRM4    | NM_000741    | chr11 | - | 46404638  | 46410108  | 3468 | 3421 | 8.666975  |
| MCART2   | NM_001034172 | chr18 | - | 29337657  | 29342844  | 114  | 0    | 8.653635  |
| EFCAB7   | NM_032437    | chr1  | + | 63987011  | 64040365  | 949  | 885  | 8.646905  |
| MXD4     | NM_006454    | chr4  | - | 2247158   | 2265740   | 5864 | 5505 | 8.644575  |
| FOLH1    | NM_004476    | chr11 | - | 49166185  | 49232223  | 688  | 672  | 8.6199675 |
| LRIT1    | NM_015613    | chr10 | - | 85989274  | 86003218  | 438  | 319  | 8.597085  |
| NUDT10   | NM_153183    | chrX  | + | 51073081  | 51082378  | 2215 | 2137 | 8.596395  |
| HRH2     | NM_022304    | chr5  | + | 175106462 | 175113559 | 303  | 200  | 8.577695  |
| EME2     | NM_001010865 | chr16 | + | 1821227   | 1828240   | 6646 | 4157 | 8.54587   |
| KIAA1328 | NM_020776    | chr18 | + | 34407078  | 34807289  | 2432 | 2212 | 8.54407   |
| GSTT2    | NM_000854    | chr22 | + | 24320312  | 24328107  | 1997 | 1457 | 8.54297   |
| KIAA1919 | NM_153369    | chr6  | + | 111578480 | 111592262 | 1438 | 1410 | 8.540285  |
| GATM     | NM_001482    | chr15 | - | 45651320  | 45672981  | 1152 | 1008 | 8.536585  |
| IFNK     | NM_020124    | chr9  | + | 27522310  | 27528497  | 434  | 205  | 8.532695  |
| PLAC8L1  | NM_001029869 | chr5  | - | 145461874 | 145485947 | 602  | 335  | 8.53041   |
| TWIST1   | NM_000474    | chr7  | - | 19153089  | 19159296  | 3277 | 2790 | 8.528955  |
| OSCP1    | NM_206837    | chr1  | - | 36891899  | 36918087  | 2076 | 1851 | 8.5205325 |
| TEX101   | NM_031451    | chr19 | + | 43890761  | 43924768  | 753  | 0    | 8.504125  |
| FOXD2    | NM_004474    | chr1  | + | 47899687  | 47908364  | 5401 | 5237 | 8.500285  |
| ACBD5    | NM_145698    | chr10 | - | 27482141  | 27531809  | 1910 | 1801 | 8.4988    |
| RTP1     | NM_153708    | chr3  | + | 186913272 | 186921254 | 987  | 590  | 8.496085  |
| C6       | NM_001115131 | chr5  | - | 41140334  | 41263541  | 409  | 280  | 8.48318   |
| GLIPR1L1 | NM_152779    | chr12 | + | 75726461  | 75766170  | 704  | 647  | 8.48229   |

|          |              |       |   |           |           |      |      |           |
|----------|--------------|-------|---|-----------|-----------|------|------|-----------|
| SCXB     | NM_001080514 | chr8  | + | 145488601 | 145494132 | 4847 | 4677 | 8.472695  |
| SULT1E1  | NM_005420    | chr4  | - | 70704928  | 70727871  | 586  | 157  | 8.46898   |
| HYI      | NM_031207    | chr1  | - | 43914822  | 43921661  | 2583 | 2386 | 8.46687   |
| MYL5     | NM_002477    | chr4  | + | 669709    | 677818    | 7649 | 6966 | 8.43995   |
| RIBC2    | NM_015653    | chr22 | + | 45807572  | 45830296  | 2183 | 1967 | 8.433865  |
| ALX1     | NM_006982    | chr12 | + | 85672034  | 85697562  | 1723 | 1554 | 8.426795  |
| S100A12  | NM_005621    | chr1  | - | 153344182 | 153350076 | 694  | 584  | 8.409455  |
| ZNF177   | NM_003451    | chr19 | + | 9471694   | 9495294   | 142  | 0    | 8.4056    |
| PCDH7    | NM_032457    | chr4  | + | 30720035  | 31150424  | 5730 | 5581 | 8.401675  |
| DUS3L    | NM_020175    | chr19 | - | 5783151   | 5793250   | 3773 | 3287 | 8.394535  |
| ZMYND17  | NM_001024593 | chr10 | - | 75181335  | 75195320  | 240  | 0    | 8.38612   |
| TRIM45   | NM_025188    | chr1  | - | 117651675 | 117666412 | 1380 | 1247 | 8.38089   |
| OSBPL7   | NM_145798    | chr17 | - | 45882731  | 45901148  | 3686 | 3660 | 8.3795475 |
| ATP13A4  | NM_032279    | chr3  | - | 193117864 | 193274697 | 1331 | 409  | 8.3504    |
| RNF175   | NM_173662    | chr4  | - | 154629310 | 154683388 | 2292 | 1897 | 8.343875  |
| C13orf31 | NM_153218    | chr13 | + | 44451967  | 44470069  | 1490 | 1277 | 8.341395  |
| ATHL1    | NM_025092    | chr11 | + | 287136    | 297689    | 6557 | 6233 | 8.33568   |
| C3orf30  | NM_152539    | chr3  | + | 118862995 | 118872303 | 645  | 433  | 8.332445  |
| KRT75    | NM_004693    | chr12 | - | 52815852  | 52830111  | 1276 | 714  | 8.32483   |
| ESCO2    | NM_001017420 | chr8  | + | 27630056  | 27664425  | 1138 | 1086 | 8.306545  |
| HMGB2    | NM_002129    | chr4  | - | 174250525 | 174257596 | 2131 | 2022 | 8.28392   |
| FOXD4L1  | NM_012184    | chr2  | + | 114254659 | 114260728 | 559  | 227  | 8.281415  |
| FZD10    | NM_007197    | chr12 | + | 130645030 | 130652286 | 2694 | 2534 | 8.260565  |
| HPGD     | NM_001145816 | chr4  | - | 175409326 | 175445793 | 1502 | 1069 | 8.25736   |

|           |              |       |   |           |           |      |      |          |
|-----------|--------------|-------|---|-----------|-----------|------|------|----------|
| NHLH2     | NM_005599    | chr1  | - | 116376997 | 116385748 | 2068 | 1708 | 8.251295 |
| CXCL3     | NM_002090    | chr4  | - | 74900310  | 74906491  | 1284 | 939  | 8.24825  |
| GJA5      | NM_181703    | chr1  | - | 147226330 | 147234715 | 774  | 472  | 8.24526  |
| IL1RAP    | NM_134470    | chr3  | + | 190229838 | 190350074 | 4586 | 4352 | 8.244805 |
| EDIL3     | NM_005711    | chr5  | - | 83236124  | 83682612  | 2702 | 2574 | 8.241255 |
| TDRKH     | NM_006862    | chr1  | - | 151742039 | 151765011 | 2190 | 1990 | 8.23386  |
| MGAM      | NM_004668    | chr7  | + | 141693677 | 141808548 | 1107 | 408  | 8.230015 |
| RECQL4    | NM_004260    | chr8  | - | 145734665 | 145745211 | 5787 | 5721 | 8.209135 |
| OR10S1    | NM_001004474 | chr11 | - | 123845401 | 123850399 | 371  | 0    | 8.2011   |
| CRYBB2    | NM_000496    | chr22 | + | 25613610  | 25629837  | 1890 | 1325 | 8.192905 |
| C9orf123  | NM_033428    | chr9  | - | 7794489   | 7801800   | 1078 | 1034 | 8.179175 |
| KRTAP12-3 | NM_198697    | chr21 | + | 46075847  | 46080259  | 217  | 188  | 8.179055 |
| SLAMF7    | NM_021181    | chr1  | + | 160707075 | 160726602 | 721  | 176  | 8.172315 |
| C4orf48   | NM_001168243 | chr4  | + | 2041718   | 2047698   | 5080 | 4719 | 8.168295 |
| FOXI2     | NM_207426    | chr10 | + | 129533536 | 129541451 | 2163 | 1824 | 8.16379  |
| ZNF428    | NM_182498    | chr19 | - | 44109374  | 44126015  | 2091 | 1946 | 8.139205 |
| MEP1A     | NM_005588    | chr6  | + | 46759092  | 46809520  | 1138 | 113  | 8.12878  |
| TRMU      | NM_018006    | chr22 | + | 46729296  | 46755238  | 7746 | 6262 | 8.126024 |
| GLI4      | NM_138465    | chr8  | + | 144347605 | 144361102 | 8081 | 7960 | 8.124615 |
| C18orf62  | NM_001037331 | chr18 | - | 73119825  | 73141590  | 758  | 748  | 8.113605 |
| NPPB      | NM_002521    | chr1  | - | 11915519  | 11920993  | 1092 | 782  | 8.111615 |
| USP51     | NM_201286    | chrX  | - | 55509047  | 55517632  | 2015 | 1896 | 8.1052   |
| SYDE2     | NM_032184    | chr1  | - | 85621354  | 85668729  | 2001 | 1993 | 8.085775 |
| SLITRK6   | NM_032229    | chr13 | - | 86364920  | 86375484  | 314  | 273  | 8.08181  |

|           |              |       |   |           |           |      |      |             |
|-----------|--------------|-------|---|-----------|-----------|------|------|-------------|
| CNTN1     | NM_175038    | chr12 | + | 41084356  | 41466095  | 2645 | 1560 | 8.073015    |
| IZUMO4    | NM_001039846 | chr19 | + | 2094866   | 2101584   | 4089 | 3416 | 8.061198333 |
| WFDC6     | NM_080827    | chr20 | - | 44160834  | 44170135  | 324  | 0    | 8.061145    |
| C16orf68  | NM_024109    | chr16 | + | 8713525   | 8742080   | 2434 | 2282 | 8.04464     |
| ZNF571    | NM_016536    | chr19 | - | 38053153  | 38087674  | 1529 | 1517 | 8.03249     |
| LILRA3    | NM_006865    | chr19 | - | 54797853  | 54806266  | 154  | 147  | 8.01969     |
| ZFP57     | NM_001109809 | chr6  | - | 29638167  | 29646932  | 1401 | 521  | 8.006545    |
| ABP1      | NM_001091    | chr7  | + | 150547571 | 150560380 | 683  | 683  | 8.001735    |
| C5orf38   | NM_178569    | chr5  | + | 2750260   | 2757512   | 6130 | 6100 | 7.99812     |
| ZNF429    | NM_001001415 | chr19 | + | 21686435  | 21723080  | 1137 | 1029 | 7.975385    |
| FOXD4     | NM_207305    | chr9  | - | 114232    | 120418    | 646  | 380  | 7.966735    |
| KRTAP19-1 | NM_181607    | chr21 | - | 31850362  | 31854637  | 85   | 0    | 7.949915    |
| FZD8      | NM_031866    | chr10 | - | 35925175  | 35932363  | 4392 | 4117 | 7.94913     |
| COX6A2    | NM_005205    | chr16 | - | 31437053  | 31441722  | 1225 | 1112 | 7.936395    |
| ZNF430    | NM_025189    | chr19 | + | 21201424  | 21244853  | 1276 | 1156 | 7.934905    |
| CDH9      | NM_016279    | chr5  | - | 26878707  | 27040690  | 160  | 0    | 7.92571     |
| PAGE4     | NM_007003    | chrX  | + | 49591904  | 49600571  | 37   | 0    | 7.92158     |
| ARID2     | NM_152641    | chr12 | + | 46121618  | 46303820  | 2958 | 2924 | 7.89893     |
| WDR72     | NM_182758    | chr15 | - | 53803936  | 54053860  | 1235 | 905  | 7.898405    |
| CLEC18B   | NM_001011880 | chr16 | - | 74440527  | 74457369  | 544  | 520  | 7.893225    |
| CXorf57   | NM_018015    | chrX  | + | 105853158 | 105924674 | 855  | 855  | 7.88238     |
| KRT33A    | NM_004138    | chr17 | - | 39500369  | 39509057  | 622  | 130  | 7.876315    |
| C6orf138  | NM_207499    | chr6  | - | 47865343  | 48038426  | 755  | 69   | 7.875975    |
| C8orf30A  | NM_016458    | chr8  | + | 145435878 | 145442829 | 3602 | 3011 | 7.86598     |



|          |              |       |   |           |           |      |      |          |
|----------|--------------|-------|---|-----------|-----------|------|------|----------|
| ENPP5    | NM_021572    | chr6  | - | 46125760  | 46140718  | 595  | 514  | 7.850805 |
| TOX3     | NM_001146188 | chr16 | - | 52469916  | 52583715  | 2240 | 1830 | 7.84675  |
| SLC5A1   | NM_000343    | chr22 | + | 32437017  | 32511012  | 2194 | 1944 | 7.84092  |
| KEL      | NM_000420    | chr7  | - | 142636199 | 142661504 | 1874 | 1183 | 7.836565 |
| FOLH1B   | NM_153696    | chr11 | + | 89390463  | 89433887  | 238  | 53   | 7.821425 |
| LCE3D    | NM_032563    | chr1  | - | 152549858 | 152554981 | 520  | 437  | 7.81877  |
| TRPC1    | NM_003304    | chr3  | + | 142441264 | 142528730 | 1719 | 1696 | 7.78144  |
| C11orf65 | NM_152587    | chr11 | - | 108251725 | 108340259 | 1359 | 1178 | 7.77869  |
| OR52M1   | NM_001004137 | chr11 | + | 4564419   | 4569375   | 245  | 135  | 7.77045  |
| ACTR8    | NM_022899    | chr3  | - | 53899092  | 53918230  | 1411 | 1318 | 7.770265 |
| PENK     | NM_006211    | chr8  | - | 57351511  | 57360594  | 1875 | 983  | 7.766385 |
| CDK5R2   | NM_003936    | chr2  | + | 219822396 | 219828878 | 4898 | 4832 | 7.76284  |
| IER5L    | NM_203434    | chr9  | - | 131935829 | 131942541 | 5318 | 5236 | 7.74995  |
| EIF2C4   | NM_017629    | chr1  | + | 36271826  | 36323189  | 1823 | 1775 | 7.74161  |
| FEZF2    | NM_018008    | chr3  | - | 62353345  | 62361191  | 3804 | 3486 | 7.73766  |
| CYP2A13  | NM_000766    | chr19 | + | 41592366  | 41604100  | 372  | 325  | 7.73482  |
| EFCAB1   | NM_024593    | chr8  | - | 49633951  | 49649871  | 638  | 564  | 7.707335 |
| ST6GAL2  | NM_032528    | chr2  | - | 107416054 | 107505564 | 2334 | 2050 | 7.694645 |
| CSAG1    | NM_153478    | chrX  | + | 151901226 | 151911519 | 187  | 117  | 7.69193  |
| FAM117B  | NM_173511    | chr2  | + | 203497899 | 203636481 | 3475 | 2829 | 7.6758   |
| SLC29A4  | NM_153247    | chr7  | + | 5320559   | 5345705   | 6681 | 6481 | 7.650645 |
| GUCY1A2  | NM_000855    | chr11 | - | 106555908 | 106891172 | 3719 | 2969 | 7.64223  |
| DEFB4A   | NM_004942    | chr8  | + | 7750197   | 7756238   | 247  | 189  | 7.63967  |
| BMP2     | NM_001200    | chr20 | + | 6746743   | 6762911   | 3388 | 3149 | 7.632695 |

|         |              |       |   |           |           |      |      |          |
|---------|--------------|-------|---|-----------|-----------|------|------|----------|
| FBXO8   | NM_012180    | chr4  | - | 175155808 | 175207403 | 1582 | 1521 | 7.62431  |
| GABRG3  | NM_033223    | chr15 | + | 27214427  | 27780374  | 5668 | 3955 | 7.616405 |
| PTPRD   | NM_130393    | chr9  | - | 8312244   | 8735947   | 2766 | 1336 | 7.6164   |
| PRMT8   | NM_019854    | chr12 | + | 3598423   | 3705139   | 4292 | 3934 | 7.60614  |
| LEP     | NM_000230    | chr7  | + | 127879329 | 127899683 | 985  | 937  | 7.57826  |
| STX19   | NM_001001850 | chr3  | - | 93731213  | 93749455  | 384  | 0    | 7.56018  |
| NKX2-4  | NM_033176    | chr20 | - | 21374003  | 21380048  | 1849 | 1629 | 7.554645 |
| GALNT12 | NM_024642    | chr9  | + | 101567979 | 101614360 | 4229 | 4146 | 7.549235 |
| CCK     | NM_001174138 | chr3  | - | 42297316  | 42307440  | 1846 | 1818 | 7.54731  |
| LASS3   | NM_178842    | chr15 | - | 100938598 | 101086926 | 1570 | 845  | 7.539645 |
| POU3F4  | NM_000307    | chrX  | + | 82761267  | 82766776  | 957  | 740  | 7.527765 |
| UCP1    | NM_021833    | chr4  | - | 141479048 | 141491960 | 1089 | 995  | 7.51818  |
| CXCR2   | NM_001557    | chr2  | + | 218988734 | 219003977 | 339  | 126  | 7.495795 |
| PTF1A   | NM_178161    | chr10 | + | 23479458  | 23485182  | 3413 | 2842 | 7.48868  |
| CLDN8   | NM_199328    | chr21 | - | 31584322  | 31590470  | 219  | 0    | 7.48612  |
| RAB19   | NM_001008749 | chr7  | + | 140101841 | 140128051 | 629  | 560  | 7.45721  |
| ZFP2    | NM_030613    | chr5  | + | 178320914 | 178362211 | 1276 | 1004 | 7.45263  |
| CCDC11  | NM_145020    | chr18 | - | 47751561  | 47794866  | 2070 | 1684 | 7.445045 |
| PHKA1   | NM_002637    | chrX  | - | 71796662  | 71936030  | 4192 | 4038 | 7.441685 |
| RBP2    | NM_004164    | chr3  | - | 139169724 | 139197353 | 484  | 331  | 7.43861  |
| MESPI1  | NM_018670    | chr15 | - | 90291096  | 90296541  | 2142 | 1994 | 7.425455 |
| HSPB9   | NM_033194    | chr17 | + | 40272754  | 40277372  | 2176 | 1520 | 7.41326  |
| LRFN2   | NM_020737    | chr6  | - | 40357371  | 40557127  | 7420 | 5947 | 7.38609  |
| RNF2    | NM_007212    | chr1  | + | 185012549 | 185073741 | 1904 | 1718 | 7.38139  |

|          |              |       |   |           |           |      |      |           |
|----------|--------------|-------|---|-----------|-----------|------|------|-----------|
| SNX18    | NM_052870    | chr5  | + | 53811591  | 53818835  | 1913 | 1880 | 7.380715  |
| ANKK1    | NM_178510    | chr11 | + | 113256511 | 113273141 | 1302 | 829  | 7.37709   |
| C5orf43  | NM_001048249 | chr5  | - | 60451534  | 60460303  | 1272 | 1226 | 7.36838   |
| SH2D1A   | NM_002351    | chrX  | + | 123478130 | 123509011 | 340  | 0    | 7.364625  |
| CHML     | NM_001821    | chr1  | - | 241790165 | 241801233 | 441  | 428  | 7.353325  |
| CYSLTR1  | NM_006639    | chrX  | - | 77526128  | 77585088  | 902  | 336  | 7.35327   |
| OR10A3   | NM_001003745 | chr11 | - | 7958121   | 7963068   | 116  | 0    | 7.34732   |
| KRT37    | NM_003770    | chr17 | - | 39574807  | 39582823  | 899  | 358  | 7.340675  |
| GYS2     | NM_021957    | chr12 | - | 21687121  | 21759782  | 432  | 177  | 7.33584   |
| MBD2     | NM_015832    | chr18 | - | 51727045  | 51753159  | 1865 | 1809 | 7.3192375 |
| PGLYRP1  | NM_005091    | chr19 | - | 46520410  | 46528557  | 1205 | 936  | 7.318175  |
| MFSD6L   | NM_152599    | chr17 | - | 8698426   | 8704668   | 763  | 133  | 7.317695  |
| ERP27    | NM_152321    | chr12 | - | 15064974  | 15093464  | 586  | 349  | 7.290685  |
| STK32A   | NM_145001    | chr5  | + | 146612577 | 146730393 | 1801 | 1130 | 7.28586   |
| ZNF319   | NM_020807    | chr16 | - | 58026571  | 58035763  | 5069 | 3770 | 7.280485  |
| KLF14    | NM_138693    | chr7  | - | 130415394 | 130420889 | 1675 | 1660 | 7.28012   |
| H2BFM    | NM_001164416 | chrX  | + | 103292514 | 103299022 | 119  | 0    | 7.2742    |
| ZIK1     | NM_001010879 | chr19 | + | 58093626  | 58105759  | 818  | 791  | 7.2735    |
| CLDN25   | NM_001101389 | chr11 | + | 113648516 | 113653208 | 915  | 489  | 7.26823   |
| LYZL4    | NM_144634    | chr3  | - | 42436573  | 42454066  | 177  | 0    | 7.261845  |
| RIN1     | NM_004292    | chr11 | - | 66097540  | 66106001  | 3621 | 3462 | 7.25799   |
| TDRD6    | NM_001168359 | chr6  | + | 46653610  | 46674057  | 267  | 222  | 7.252165  |
| ZC3HAV1L | NM_080660    | chr7  | - | 138708450 | 138722776 | 2380 | 2216 | 7.251905  |
| C2orf61  | NM_173649    | chr2  | - | 47353585  | 47384518  | 399  | 360  | 7.23381   |

|          |              |       |   |           |           |      |      |           |
|----------|--------------|-------|---|-----------|-----------|------|------|-----------|
| ZNF347   | NM_032584    | chr19 | - | 53639955  | 53664323  | 1133 | 976  | 7.233375  |
| PSG3     | NM_021016    | chr19 | - | 43223792  | 43246669  | 216  | 0    | 7.230035  |
| IL1F10   | NM_173161    | chr2  | + | 113823545 | 113835428 | 1019 | 214  | 7.2233475 |
| S100G    | NM_004057    | chrX  | + | 16666279  | 16674792  | 100  | 0    | 7.22068   |
| OAZ3     | NM_016178    | chr1  | + | 151737129 | 151745807 | 622  | 0    | 7.216245  |
| ATP13A5  | NM_198505    | chr3  | - | 192990829 | 193098515 | 861  | 531  | 7.21511   |
| GDA      | NM_004293    | chr9  | + | 74762291  | 74869141  | 1666 | 1631 | 7.19519   |
| SST      | NM_001048    | chr3  | - | 187384692 | 187390202 | 292  | 272  | 7.180285  |
| TIGD5    | NM_032862    | chr8  | + | 144678072 | 144684486 | 5348 | 5022 | 7.17221   |
| DDIT4L   | NM_145244    | chr4  | - | 101105025 | 101113656 | 1342 | 1200 | 7.164355  |
| PARP15   | NM_152615    | chr3  | + | 122332523 | 122357537 | 495  | 349  | 7.15906   |
| KCNS2    | NM_020697    | chr8  | + | 99437248  | 99445024  | 2207 | 1918 | 7.151235  |
| MCM9     | NM_153255    | chr6  | - | 119229760 | 119258304 | 1303 | 1205 | 7.131725  |
| ARHGDIG  | NM_001176    | chr16 | + | 328604    | 335004    | 6025 | 5984 | 7.1145    |
| SOX14    | NM_004189    | chr3  | + | 137481577 | 137486397 | 1213 | 853  | 7.104185  |
| UGT2B15  | NM_001076    | chr4  | - | 69510313  | 69538375  | 51   | 0    | 7.08356   |
| PPP4R4   | NM_058237    | chr14 | + | 94638647  | 94748073  | 3540 | 3307 | 7.0661775 |
| SDR9C7   | NM_148897    | chr12 | - | 57314936  | 57330190  | 329  | 227  | 7.060185  |
| ZNF80    | NM_007136    | chr3  | - | 113951478 | 113958426 | 47   | 0    | 7.05912   |
| LRRC66   | NM_001024611 | chr4  | - | 52857864  | 52885787  | 245  | 0    | 7.04454   |
| C12orf39 | NM_030572    | chr12 | + | 21677254  | 21686211  | 1005 | 849  | 7.034685  |
| RASGEF1B | NM_152545    | chr4  | - | 82346217  | 82395062  | 3609 | 1691 | 7.01997   |
| BHLHE41  | NM_030762    | chr12 | - | 26270957  | 26280004  | 4559 | 4531 | 7.00431   |
| DUSP21   | NM_022076    | chrX  | + | 44701247  | 44706135  | 617  | 573  | 6.99094   |

|         |              |       |   |           |           |      |      |          |
|---------|--------------|-------|---|-----------|-----------|------|------|----------|
| RDH16   | NM_003708    | chr12 | - | 57343214  | 57353419  | 641  | 569  | 6.970065 |
| IBSP    | NM_004967    | chr4  | + | 88718700  | 88735602  | 83   | 0    | 6.967165 |
| SPOCK3  | NM_016950    | chr4  | - | 167652534 | 168157742 | 2719 | 1832 | 6.936455 |
| MAGEL2  | NM_019066    | chr15 | - | 23886694  | 23894994  | 2348 | 1363 | 6.918345 |
| IL1F5   | NM_173170    | chr2  | + | 113814213 | 113824321 | 444  | 0    | 6.91387  |
| CXCL9   | NM_002416    | chr4  | - | 76920621  | 76930642  | 381  | 222  | 6.912545 |
| COL21A1 | NM_030820    | chr6  | - | 55919386  | 56114379  | 2189 | 1666 | 6.88939  |
| SNTG2   | NM_018968    | chr2  | + | 944552    | 1373385   | 7920 | 7428 | 6.87619  |
| DSCAM   | NM_001389    | chr21 | - | 41382341  | 42221040  | 6839 | 2801 | 6.86484  |
| IL1F9   | NM_019618    | chr2  | + | 113733604 | 113745228 | 71   | 0    | 6.861105 |
| DMRT3   | NM_021240    | chr9  | + | 974962    | 993733    | 3006 | 2762 | 6.85526  |
| UGT2B17 | NM_001077    | chr4  | - | 69400901  | 69436246  | 159  | 0    | 6.844095 |
| ACTL7A  | NM_006687    | chr9  | + | 111622601 | 111628036 | 487  | 381  | 6.838355 |
| SLN     | NM_003063    | chr11 | - | 107576099 | 107584788 | 142  | 98   | 6.8363   |
| ACTBL2  | NM_001017992 | chr5  | - | 56773841  | 56780637  | 120  | 95   | 6.83282  |
| AMPD1   | NM_001172626 | chr1  | - | 115213718 | 115240240 | 472  | 265  | 6.828385 |
| SOSTDC1 | NM_015464    | chr7  | - | 16499104  | 16507475  | 213  | 0    | 6.827585 |
| CCDC67  | NM_181645    | chr11 | + | 93061881  | 93173637  | 1038 | 457  | 6.81278  |
| SPRR4   | NM_173080    | chr1  | + | 152941126 | 152947070 | 312  | 0    | 6.808745 |
| MT1B    | NM_005947    | chr16 | + | 56683809  | 56689117  | 648  | 522  | 6.803505 |
| HHLA2   | NM_007072    | chr3  | + | 108019330 | 108099127 | 562  | 535  | 6.7911   |
| RBMXL3  | NM_001145346 | chrX  | + | 114421961 | 114429432 | 231  | 0    | 6.786725 |
| SCN2B   | NM_004588    | chr11 | - | 118031517 | 118049338 | 3724 | 3360 | 6.78128  |
| NOS1    | NM_000620    | chr12 | - | 117646775 | 117801608 | 6898 | 5956 | 6.761075 |

|         |              |       |   |           |           |      |      |           |
|---------|--------------|-------|---|-----------|-----------|------|------|-----------|
| FREM2   | NM_207361    | chr13 | + | 39259171  | 39463268  | 1145 | 546  | 6.75432   |
| RBFOX1  | NM_145893    | chr16 | + | 7380749   | 7765341   | 1811 | 1027 | 6.7518775 |
| KRT1    | NM_006121    | chr12 | - | 53066518  | 53076192  | 478  | 212  | 6.74943   |
| AMIGO3  | NM_198722    | chr3  | - | 49752265  | 49759239  | 2041 | 1760 | 6.749085  |
| CNGA4   | NM_001037329 | chr11 | + | 6258328   | 6267708   | 190  | 0    | 6.74636   |
| KIR2DL4 | NM_002255    | chr19 | + | 55313065  | 55327973  | 132  | 0    | 6.72467   |
| KBTBD8  | NM_032505    | chr3  | + | 67046725  | 67063633  | 1436 | 1299 | 6.69751   |
| C2orf71 | NM_001029883 | chr2  | - | 29282556  | 29299128  | 2793 | 1670 | 6.682395  |
| KRT32   | NM_002278    | chr17 | - | 39613763  | 39625639  | 778  | 747  | 6.667765  |
| CALCB   | NM_000728    | chr11 | + | 15093144  | 15102178  | 1214 | 1058 | 6.654455  |
| TSSK2   | NM_053006    | chr22 | + | 19116319  | 19122137  | 1496 | 163  | 6.63054   |
| DNASE2B | NM_058248    | chr1  | + | 84872032  | 84882692  | 269  | 194  | 6.624435  |
| TAS2R14 | NM_023922    | chr12 | - | 11088851  | 11093807  | 239  | 222  | 6.62417   |
| H1FNT   | NM_181788    | chr12 | + | 48720761  | 48726063  | 490  | 0    | 6.609765  |
| XAGE3   | NM_133179    | chrX  | - | 52889556  | 52899120  | 62   | 0    | 6.59945   |
| C1QTNF7 | NM_031911    | chr4  | + | 15427627  | 15449792  | 377  | 121  | 6.59393   |
| HS6ST3  | NM_153456    | chr13 | + | 96741091  | 97493813  | 3635 | 3563 | 6.59356   |
| C1orf49 | NM_032126    | chr1  | + | 178480210 | 178493790 | 657  | 628  | 6.59318   |
| DSEL    | NM_032160    | chr18 | - | 65171817  | 65185968  | 1691 | 1543 | 6.58966   |
| IFT57   | NM_018010    | chr3  | - | 107877657 | 107943418 | 823  | 815  | 6.588315  |
| OR1N2   | NM_001004457 | chr9  | + | 125313447 | 125318442 | 76   | 0    | 6.563205  |
| IGSF11  | NM_152538    | chr3  | - | 118617477 | 118866899 | 2331 | 2237 | 6.56115   |
| PIWIL1  | NM_004764    | chr12 | + | 130820431 | 130858878 | 2323 | 1504 | 6.560385  |
| EFCAB6  | NM_198856    | chr22 | - | 43922622  | 44210218  | 6326 | 4595 | 6.55535   |

|          |              |       |   |           |           |      |      |           |
|----------|--------------|-------|---|-----------|-----------|------|------|-----------|
| FGF9     | NM_002010    | chr13 | + | 22243213  | 22280641  | 7442 | 7340 | 6.54429   |
| TSSK1B   | NM_032028    | chr5  | - | 112766249 | 112772729 | 388  | 59   | 6.529985  |
| UNC45B   | NM_173167    | chr17 | + | 33472834  | 33518365  | 3793 | 3227 | 6.522525  |
| PPP3R2   | NM_147180    | chr9  | - | 104351895 | 104359284 | 625  | 43   | 6.52028   |
| DUXA     | NM_001012729 | chr19 | - | 57661092  | 57680857  | 115  | 0    | 6.510855  |
| HTR1B    | NM_000863    | chr6  | - | 78169946  | 78175121  | 1020 | 391  | 6.499335  |
| KCTD4    | NM_198404    | chr13 | - | 45764986  | 45777176  | 272  | 0    | 6.497035  |
| REN      | NM_000537    | chr1  | - | 204121942 | 204137466 | 2025 | 1794 | 6.47526   |
| MAGEE2   | NM_138703    | chrX  | - | 75000821  | 75007080  | 190  | 38   | 6.45914   |
| SCGN     | NM_006998    | chr6  | + | 25650427  | 25704009  | 1368 | 1178 | 6.45038   |
| OPRM1    | NM_001145287 | chr6  | + | 154405640 | 154442595 | 796  | 0    | 6.4375425 |
| ZNF257   | NM_033468    | chr19 | + | 22233264  | 22275904  | 395  | 392  | 6.435435  |
| ZAR1     | NM_175619    | chr4  | + | 48490307  | 48498423  | 2309 | 2027 | 6.43152   |
| NECAB1   | NM_022351    | chr8  | + | 91801919  | 91973631  | 614  | 503  | 6.43013   |
| CALCRL   | NM_005795    | chr2  | - | 188205847 | 188315022 | 778  | 723  | 6.41602   |
| APLF     | NM_173545    | chr2  | + | 68692689  | 68809295  | 1579 | 1218 | 6.401225  |
| ARSF     | NM_004042    | chrX  | + | 2982851   | 3032748   | 559  | 465  | 6.400815  |
| SLITRK5  | NM_015567    | chr13 | + | 88322868  | 88333871  | 3011 | 2835 | 6.39942   |
| IQCF1    | NM_152397    | chr3  | - | 51926890  | 51939387  | 549  | 0    | 6.38671   |
| GRXCR1   | NM_001080476 | chr4  | + | 42893281  | 43034674  | 389  | 206  | 6.37243   |
| OR7A10   | NM_001005190 | chr19 | - | 14949758  | 14954690  | 140  | 0    | 6.36118   |
| IRAK1BP1 | NM_001010844 | chr6  | + | 79575187  | 79610321  | 1150 | 1104 | 6.357615  |
| IL21     | NM_021803    | chr4  | - | 123531781 | 123544212 | 189  | 0    | 6.33611   |
| LANCL3   | NM_198511    | chrX  | + | 37428820  | 37538751  | 3507 | 3363 | 6.334715  |

|           |              |       |   |           |           |      |      |          |
|-----------|--------------|-------|---|-----------|-----------|------|------|----------|
| C2orf51   | NM_152670    | chr2  | + | 88822167  | 88831104  | 194  | 186  | 6.334415 |
| LOC154872 | NM_001024603 | chr7  | - | 124415344 | 124432865 | 553  | 514  | 6.327125 |
| ANKRD7    | NM_019644    | chr7  | + | 117862710 | 117884785 | 227  | 0    | 6.32234  |
| CWH43     | NM_025087    | chr4  | + | 48986263  | 49066096  | 1020 | 581  | 6.313845 |
| SORCS3    | NM_014978    | chr10 | + | 106398857 | 107026994 | 4582 | 3992 | 6.30426  |
| C10orf96  | NM_198515    | chr10 | + | 118081938 | 118141542 | 275  | 0    | 6.304025 |
| CHRNA9    | NM_017581    | chr4  | + | 40335467  | 40358974  | 1357 | 1302 | 6.2979   |
| GPLD1     | NM_177483    | chr6  | - | 24471324  | 24491800  | 447  | 444  | 6.29129  |
| CSMD1     | NM_033225    | chr8  | - | 2790873   | 4854329   | 6919 | 4156 | 6.28079  |
| DEFB125   | NM_153325    | chr20 | + | 66349     | 79297     | 321  | 0    | 6.260385 |
| AADAC     | NM_001086    | chr3  | + | 151529859 | 151548277 | 473  | 336  | 6.247835 |
| ADAMTS20  | NM_025003    | chr12 | - | 43746010  | 43947725  | 965  | 869  | 6.244205 |
| PCDHAC2   | NM_031883    | chr5  | + | 140344350 | 140351007 | 835  | 583  | 6.244135 |
| CYP39A1   | NM_016593    | chr6  | - | 46515443  | 46622524  | 1770 | 1367 | 6.24118  |
| CST8      | NM_005492    | chr20 | + | 23469764  | 23478656  | 136  | 0    | 6.21506  |
| CRISPLD1  | NM_031461    | chr8  | + | 75894706  | 75948794  | 1280 | 757  | 6.207585 |
| APOL5     | NM_030642    | chr22 | + | 36111917  | 36127530  | 706  | 125  | 6.1961   |
| EGR3      | NM_004430    | chr8  | - | 22543172  | 22552816  | 5765 | 5608 | 6.168005 |
| LRIT3     | NM_198506    | chr4  | + | 110770484 | 110795472 | 232  | 0    | 6.16     |
| SLC22A14  | NM_004803    | chr3  | + | 38345443  | 38361860  | 321  | 96   | 6.127885 |
| RASSF10   | NM_001080521 | chr11 | + | 13028968  | 13035654  | 3171 | 3141 | 6.118145 |
| DYNLRB2   | NM_130897    | chr16 | + | 80572852  | 80586542  | 1180 | 953  | 6.110545 |
| DPY19L2   | NM_173812    | chr12 | - | 63950691  | 64064355  | 162  | 0    | 6.107365 |
| OR13F1    | NM_001004485 | chr9  | + | 107264542 | 107269504 | 413  | 0    | 6.101825 |



|           |              |       |   |           |           |      |      |           |
|-----------|--------------|-------|---|-----------|-----------|------|------|-----------|
| LYG2      | NM_175735    | chr2  | - | 99856709  | 99873571  | 339  | 0    | 6.099285  |
| ABHD13    | NM_032859    | chr13 | + | 108868761 | 108888604 | 1243 | 1168 | 6.09743   |
| C17orf77  | NM_152460    | chr17 | + | 72579055  | 72592349  | 160  | 118  | 6.07561   |
| PCDHGA9   | NM_032089    | chr5  | + | 140780518 | 140787007 | 675  | 663  | 6.049475  |
| ZP4       | NM_021186    | chr1  | - | 238039162 | 238056223 | 1046 | 241  | 6.037375  |
| PAGE2     | NM_207339    | chrX  | + | 55113495  | 55121261  | 138  | 129  | 6.03717   |
| C16orf82  | NM_001145545 | chr16 | + | 27076217  | 27082488  | 143  | 70   | 6.01739   |
| GAB4      | NM_001037814 | chr22 | - | 17440825  | 17491113  | 112  | 0    | 6.0145225 |
| RSAD2     | NM_080657    | chr2  | + | 7015794   | 7040364   | 528  | 476  | 6.004325  |
| OR56A5    | NM_001146033 | chr11 | - | 5986781   | 5991725   | 322  | 0    | 6.00399   |
| SERPINB12 | NM_080474    | chr18 | + | 61221391  | 61236245  | 93   | 0    | 5.97628   |
| GPR111    | NM_153839    | chr6  | + | 47622324  | 47667534  | 1997 | 1297 | 5.9745    |
| ZNF345    | NM_003419    | chr19 | + | 37339265  | 37372471  | 1765 | 1527 | 5.969525  |
| CLDN17    | NM_012131    | chr21 | - | 31536239  | 31540972  | 473  | 0    | 5.954885  |
| SMC1B     | NM_148674    | chr22 | - | 45737943  | 45811501  | 1969 | 1364 | 5.932555  |
| RBM11     | NM_144770    | chr21 | + | 15586464  | 15602694  | 637  | 369  | 5.92598   |
| KCNH8     | NM_144633    | chr3  | + | 19188015  | 19579136  | 2483 | 2330 | 5.92406   |
| DSC1      | NM_024421    | chr18 | - | 28707212  | 28744820  | 842  | 0    | 5.92287   |
| SEMG2     | NM_003008    | chr20 | + | 43848008  | 43855100  | 158  | 0    | 5.9145    |
| SCGB2A1   | NM_002407    | chr11 | + | 61974138  | 61983412  | 243  | 125  | 5.913205  |
| DYDC1     | NM_138812    | chr10 | - | 82093860  | 82118501  | 2132 | 325  | 5.902485  |
| TRPM3     | NM_206948    | chr9  | - | 73396776  | 73485975  | 527  | 297  | 5.893175  |
| STK31     | NM_032944    | chr7  | + | 23747995  | 23874128  | 1334 | 1231 | 5.88677   |
| IGFL2     | NM_001135113 | chr19 | + | 46649498  | 46666562  | 90   | 0    | 5.883935  |

|           |              |       |   |           |           |      |      |          |
|-----------|--------------|-------|---|-----------|-----------|------|------|----------|
| OR9A4     | NM_001001656 | chr7  | + | 141616674 | 141621621 | 257  | 0    | 5.88003  |
| MOS       | NM_005372    | chr8  | - | 57023499  | 57028542  | 830  | 685  | 5.87645  |
| PLA2G3    | NM_015715    | chr22 | - | 31528791  | 31538470  | 1131 | 1129 | 5.84243  |
| ALB       | NM_000477    | chr4  | + | 74267970  | 74289130  | 85   | 34   | 5.837035 |
| NPFRR2    | NM_053036    | chr4  | + | 72902847  | 73015919  | 374  | 335  | 5.82842  |
| ARSH      | NM_001011719 | chrX  | + | 2922652   | 2953427   | 615  | 177  | 5.821465 |
| KRT71     | NM_033448    | chr12 | - | 52935691  | 52948932  | 1294 | 886  | 5.817405 |
| ZNF582    | NM_144690    | chr19 | - | 56892646  | 56906890  | 1356 | 902  | 5.78686  |
| SERPINA9  | NM_175739    | chr14 | - | 94927056  | 94944671  | 742  | 685  | 5.778815 |
| UGT2B7    | NM_001074    | chr4  | + | 69960191  | 69980706  | 455  | 0    | 5.777145 |
| HEPFL1    | NM_001098672 | chr11 | + | 93752376  | 93849375  | 972  | 300  | 5.771325 |
| CRYGD     | NM_006891    | chr2  | - | 208984329 | 208991314 | 258  | 118  | 5.75637  |
| TET2      | NM_017628    | chr4  | + | 106065941 | 106165929 | 3522 | 3425 | 5.753995 |
| HRG       | NM_000412    | chr3  | + | 186381796 | 186398024 | 307  | 161  | 5.74779  |
| MAEL      | NM_032858    | chr1  | + | 166956517 | 166993448 | 144  | 0    | 5.741415 |
| MUM1L1    | NM_152423    | chrX  | + | 105410296 | 105454950 | 555  | 0    | 5.728975 |
| PIK3C2G   | NM_004570    | chr12 | + | 18412472  | 18803353  | 2459 | 2147 | 5.719945 |
| ZPLD1     | NM_175056    | chr3  | + | 102151857 | 102200686 | 356  | 314  | 5.713835 |
| AGBL1     | NM_152336    | chr15 | + | 86683240  | 87574284  | 5958 | 2841 | 5.703565 |
| ELAVL2    | NM_004432    | chr9  | - | 23688101  | 23828064  | 2672 | 1916 | 5.700865 |
| C10orf140 | NM_207371    | chr10 | - | 21800407  | 21816612  | 4461 | 4278 | 5.693865 |
| NOX4      | NM_016931    | chr11 | - | 89055520  | 89226654  | 1411 | 1047 | 5.69181  |
| LRAT      | NM_004744    | chr4  | + | 155663161 | 155676271 | 1262 | 701  | 5.67938  |
| TFAP2B    | NM_003221    | chr6  | + | 50784437  | 50817327  | 2883 | 1597 | 5.67887  |

|         |              |       |   |           |           |      |      |             |
|---------|--------------|-------|---|-----------|-----------|------|------|-------------|
| BTG4    | NM_017589    | chr11 | - | 111336254 | 111385065 | 1579 | 1250 | 5.665735    |
| HS3ST2  | NM_006043    | chr16 | + | 22823858  | 22929660  | 2561 | 2279 | 5.66503     |
| SCN9A   | NM_002977    | chr2  | - | 167049695 | 167234498 | 2222 | 1821 | 5.659625    |
| CST5    | NM_001900    | chr20 | - | 23854570  | 23862381  | 832  | 677  | 5.657185    |
| OR2C3   | NM_198074    | chr1  | - | 247691432 | 247699142 | 664  | 68   | 5.6545      |
| CDH12   | NM_004061    | chr5  | - | 21748971  | 22855732  | 3118 | 2776 | 5.65222     |
| CST11   | NM_130794    | chr20 | - | 23429039  | 23435483  | 205  | 73   | 5.651845    |
| ASCL4   | NM_203436    | chr12 | + | 108166160 | 108172422 | 698  | 350  | 5.648305    |
| KCNC2   | NM_153748    | chr12 | - | 75431894  | 75605512  | 1271 | 836  | 5.637091667 |
| OR1D5   | NM_014566    | chr17 | - | 2963961   | 2968902   | 183  | 0    | 5.616735    |
| PON3    | NM_000940    | chr7  | - | 94987182  | 95027688  | 1087 | 1087 | 5.61358     |
| AVPR1B  | NM_000707    | chr1  | + | 206222281 | 206233483 | 1693 | 1594 | 5.603695    |
| TMEM207 | NM_207316    | chr3  | - | 190144442 | 190169666 | 386  | 223  | 5.591435    |
| FAM184A | NM_024581    | chr6  | - | 119278994 | 119401813 | 1738 | 1611 | 5.58763     |
| BTBD8   | NM_183242    | chr1  | + | 92543860  | 92615402  | 1246 | 1110 | 5.57481     |
| PTH     | NM_000315    | chr11 | - | 13511599  | 13519568  | 140  | 0    | 5.573965    |
| RFX6    | NM_173560    | chr6  | + | 117196374 | 117255327 | 1204 | 1053 | 5.551085    |
| C4orf39 | NM_153027    | chr4  | + | 165876098 | 165882274 | 1131 | 821  | 5.541275    |
| RNF17   | NM_031277    | chr13 | + | 25336299  | 25456059  | 698  | 234  | 5.53185     |
| LMO3    | NM_018640    | chr12 | - | 16699305  | 16761432  | 1067 | 936  | 5.522015    |
| PHYHIPL | NM_032439    | chr10 | + | 60934346  | 61009535  | 2075 | 2027 | 5.503185    |
| CD3D    | NM_001040651 | chr11 | - | 118207787 | 118215460 | 452  | 379  | 5.502795    |
| KRT27   | NM_181537    | chr17 | - | 38931058  | 38940787  | 336  | 267  | 5.489855    |
| SLC7A3  | NM_032803    | chrX  | - | 70143428  | 70152976  | 593  | 120  | 5.488075    |

|           |           |       |   |           |           |      |      |             |
|-----------|-----------|-------|---|-----------|-----------|------|------|-------------|
| CDH18     | NM_004934 | chr5  | - | 19471153  | 19990354  | 1307 | 617  | 5.482075    |
| POM121L2  | NM_033482 | chr6  | - | 27274840  | 27282012  | 1113 | 1007 | 5.480885    |
| SYCP2     | NM_014258 | chr20 | - | 58436616  | 58509210  | 820  | 776  | 5.469715    |
| KCNMB2    | NM_181361 | chr3  | + | 178252222 | 178564218 | 2549 | 2212 | 5.449785    |
| IL3       | NM_000588 | chr5  | + | 131394345 | 131400897 | 1434 | 1149 | 5.4478      |
| SRD5A2    | NM_000348 | chr2  | - | 31747654  | 31808041  | 1567 | 659  | 5.44109     |
| RGPD4     | NM_182588 | chr2  | + | 108441386 | 108511001 | 102  | 0    | 5.435795    |
| TMPRSS11A | NM_182606 | chr4  | - | 68774017  | 68831233  | 540  | 408  | 5.43044     |
| ABRA      | NM_139166 | chr8  | - | 107769709 | 107784473 | 685  | 681  | 5.42522     |
| MPPED2    | NM_001584 | chr11 | - | 30429616  | 30604041  | 486  | 403  | 5.406955    |
| KHDRBS2   | NM_152688 | chr6  | - | 62387863  | 62998101  | 870  | 837  | 5.40383     |
| C2orf40   | NM_032411 | chr2  | + | 106680111 | 106696610 | 63   | 0    | 5.403615    |
| TEDDM1    | NM_172000 | chr1  | - | 182365250 | 182371752 | 714  | 406  | 5.401435    |
| KRTAP4-11 | NM_033059 | chr17 | - | 39271432  | 39276607  | 176  | 0    | 5.39603     |
| GPR101    | NM_054021 | chrX  | - | 136110305 | 136115834 | 1357 | 1038 | 5.385405    |
| ZNF486    | NM_052852 | chr19 | + | 20276081  | 20310985  | 1509 | 1227 | 5.384355    |
| DAOA      | NM_172370 | chr13 | + | 106116362 | 106145384 | 265  | 0    | 5.37897     |
| LINGO2    | NM_152570 | chr9  | - | 27946526  | 28721304  | 1643 | 1261 | 5.36444     |
| AQP4      | NM_004028 | chr18 | - | 24430006  | 24444576  | 652  | 480  | 5.35759     |
| NMUR2     | NM_020167 | chr5  | - | 151769100 | 151786841 | 245  | 159  | 5.35315     |
| LPHN3     | NM_015236 | chr4  | + | 62360837  | 62940169  | 1666 | 1264 | 5.347195    |
| HIST1H2BJ | NM_021058 | chr6  | - | 27098093  | 27102576  | 1116 | 1078 | 5.340975    |
| KLRC1     | NM_213658 | chr12 | - | 10596636  | 10609216  | 258  | 0    | 5.336833333 |
| TMPRSS12  | NM_182559 | chr12 | + | 51234699  | 51283664  | 933  | 568  | 5.33561     |

|         |              |       |   |           |           |      |      |           |
|---------|--------------|-------|---|-----------|-----------|------|------|-----------|
| RP1     | NM_006269    | chr8  | + | 55526625  | 55545395  | 915  | 706  | 5.325195  |
| GPR12   | NM_005288    | chr13 | - | 27327337  | 27336923  | 1634 | 1578 | 5.306065  |
| NAT2    | NM_000015    | chr8  | + | 18246753  | 18260724  | 394  | 122  | 5.289635  |
| OR7A5   | NM_017506    | chr19 | - | 14935137  | 14941277  | 95   | 0    | 5.282815  |
| ADAM7   | NM_003817    | chr8  | + | 24296507  | 24368276  | 497  | 449  | 5.278945  |
| GUCA1C  | NM_005459    | chr3  | - | 108624640 | 108674678 | 688  | 457  | 5.27306   |
| GABRA5  | NM_001165037 | chr15 | + | 27110271  | 27196358  | 4279 | 3410 | 5.265305  |
| KLRC3   | NM_007333    | chr12 | - | 10566181  | 10575195  | 423  | 192  | 5.26202   |
| TTC29   | NM_031956    | chr4  | - | 147626177 | 147869035 | 808  | 533  | 5.2574    |
| CA3     | NM_005181    | chr8  | + | 86349054  | 86363268  | 72   | 0    | 5.254765  |
| LCE1B   | NM_178349    | chr1  | + | 152782445 | 152787586 | 367  | 0    | 5.246285  |
| NPHP3   | NM_153240    | chr3  | - | 132397452 | 132443277 | 1742 | 1728 | 5.22285   |
| MC2R    | NM_000529    | chr18 | - | 13880041  | 13917536  | 1455 | 1239 | 5.203155  |
| KLB     | NM_175737    | chr4  | + | 39406471  | 39455154  | 1202 | 1182 | 5.179405  |
| EPHA3   | NM_182644    | chr3  | + | 89154672  | 89451496  | 2418 | 1609 | 5.1720975 |
| SPINK6  | NM_205841    | chr5  | + | 147580355 | 147596701 | 301  | 0    | 5.16761   |
| NT5C1B  | NM_033253    | chr2  | - | 18742135  | 18772839  | 448  | 244  | 5.138775  |
| XK      | NM_021083    | chrX  | + | 37543131  | 37593384  | 1598 | 1298 | 5.124365  |
| C7      | NM_000587    | chr5  | + | 40907597  | 40985043  | 263  | 0    | 5.12205   |
| LPL     | NM_000237    | chr8  | + | 19794580  | 19826771  | 1106 | 1016 | 5.120795  |
| SLC26A7 | NM_134266    | chr8  | + | 92259514  | 92408947  | 1450 | 1178 | 5.117265  |
| TEX15   | NM_031271    | chr8  | - | 30687058  | 30708534  | 110  | 0    | 5.111785  |
| DYDC2   | NM_032372    | chr10 | + | 82114556  | 82129830  | 1664 | 325  | 5.103495  |
| EPHA7   | NM_004440    | chr6  | - | 93947738  | 94131301  | 3320 | 2591 | 5.10189   |

|           |              |       |   |           |           |      |      |           |
|-----------|--------------|-------|---|-----------|-----------|------|------|-----------|
| C10orf113 | NM_001177483 | chr10 | - | 21412690  | 21437489  | 273  | 0    | 5.08054   |
| BAI3      | NM_001704    | chr6  | + | 69343630  | 70101404  | 2907 | 2621 | 5.075795  |
| HIST1H2AG | NM_021064    | chr6  | + | 27098815  | 27103315  | 1116 | 1078 | 5.07573   |
| RPE65     | NM_000329    | chr1  | - | 68892505  | 68917643  | 435  | 337  | 5.0523    |
| TLL1      | NM_012464    | chr4  | + | 166792408 | 167026994 | 4508 | 3824 | 5.040215  |
| KRTAP2-4  | NM_033184    | chr17 | - | 39219366  | 39224132  | 500  | 285  | 5.036965  |
| WIF1      | NM_007191    | chr12 | - | 65442402  | 65517347  | 452  | 324  | 5.033465  |
| KLRK1     | NM_007360    | chr12 | - | 10522950  | 10544641  | 217  | 45   | 5.032745  |
| ADAMTS19  | NM_133638    | chr5  | + | 128794101 | 129076377 | 2950 | 2490 | 5.032245  |
| OR2H1     | NM_030883    | chr6  | + | 29424228  | 29434100  | 207  | 0    | 5.0322    |
| KCNV1     | NM_014379    | chr8  | - | 110977231 | 110988960 | 924  | 318  | 5.02032   |
| ART3      | NM_001179    | chr4  | + | 76993861  | 77035956  | 1215 | 879  | 5.018255  |
| SPAM1     | NM_153189    | chr7  | + | 123563284 | 123602101 | 315  | 0    | 5.0166325 |
| PRSS54    | NM_001080492 | chr16 | - | 58311899  | 58330952  | 1265 | 117  | 5.008025  |
| FGL1      | NM_201553    | chr8  | - | 17719898  | 17754914  | 466  | 336  | 4.9983375 |
| SCN3A     | NM_006922    | chr2  | - | 165942028 | 166062578 | 227  | 0    | 4.997805  |
| SLC5A7    | NM_021815    | chr2  | + | 108600993 | 108632444 | 186  | 0    | 4.990015  |
| CALCR     | NM_001742    | chr7  | - | 93051797  | 93206043  | 1435 | 1197 | 4.984715  |
| ST8SIA4   | NM_175052    | chr5  | - | 100219013 | 100240971 | 762  | 674  | 4.9830375 |
| POTEC     | NM_001137671 | chr18 | - | 14509735  | 14545600  | 44   | 0    | 4.98231   |
| CENPC1    | NM_001812    | chr4  | - | 68335987  | 68413257  | 1022 | 890  | 4.969985  |
| LHX8      | NM_001001933 | chr1  | + | 75592117  | 75629219  | 692  | 578  | 4.96153   |
| CA1       | NM_001738    | chr8  | - | 86238456  | 86292343  | 412  | 238  | 4.93995   |
| SLC17A6   | NM_020346    | chr11 | + | 22357665  | 22403047  | 292  | 161  | 4.922945  |

|          |              |       |   |           |           |      |      |          |
|----------|--------------|-------|---|-----------|-----------|------|------|----------|
| MAGEA4   | NM_002362    | chrX  | + | 151082707 | 151095643 | 605  | 378  | 4.91411  |
| SOST     | NM_025237    | chr17 | - | 41829097  | 41838157  | 3186 | 2541 | 4.906105 |
| PLCZ1    | NM_033123    | chr12 | - | 18834114  | 18892919  | 1018 | 906  | 4.90241  |
| DEFB110  | NM_001037728 | chr6  | - | 49974849  | 49991695  | 97   | 0    | 4.90197  |
| GPR149   | NM_001038705 | chr3  | - | 154053459 | 154149505 | 344  | 185  | 4.88907  |
| HHIP     | NM_022475    | chr4  | + | 145565171 | 145661882 | 2111 | 1102 | 4.88151  |
| SYNPR    | NM_144642    | chr3  | + | 63426751  | 63604598  | 628  | 451  | 4.851435 |
| POU3F2   | NM_005604    | chr6  | + | 99280578  | 99288667  | 3929 | 3923 | 4.818575 |
| LRRC3B   | NM_052953    | chr3  | + | 26662298  | 26754266  | 1648 | 1162 | 4.808025 |
| AMIGO2   | NM_181847    | chr12 | - | 47467488  | 47475735  | 2531 | 2438 | 4.80576  |
| CLGN     | NM_004362    | chr4  | - | 141307605 | 141350816 | 1470 | 1437 | 4.803665 |
| SMCP     | NM_030663    | chr1  | + | 152848796 | 152859524 | 1130 | 777  | 4.803345 |
| GZMB     | NM_004131    | chr14 | - | 25098159  | 25105433  | 487  | 0    | 4.77329  |
| C14orf39 | NM_174978    | chr14 | - | 60900672  | 60954765  | 816  | 0    | 4.770665 |
| CLEC5A   | NM_013252    | chr7  | - | 141625155 | 141648784 | 339  | 0    | 4.764725 |
| SLC10A2  | NM_000452    | chr13 | - | 103694346 | 103721197 | 449  | 140  | 4.76383  |
| SCN2A    | NM_021007    | chr2  | + | 166148339 | 166250821 | 924  | 692  | 4.74905  |
| HRNR     | NM_001009931 | chr1  | - | 152182556 | 152198670 | 575  | 0    | 4.739165 |
| ICOS     | NM_012092    | chr2  | + | 204799469 | 204828299 | 541  | 85   | 4.73868  |
| CXorf22  | NM_152632    | chrX  | + | 35935849  | 36010270  | 653  | 0    | 4.700705 |
| MAGEC2   | NM_016249    | chrX  | - | 141288126 | 141295077 | 261  | 182  | 4.67852  |
| PGR      | NM_000926    | chr11 | - | 100898353 | 101002545 | 2457 | 1971 | 4.63997  |
| OXGR1    | NM_080818    | chr13 | - | 97635971  | 97648605  | 760  | 441  | 4.63972  |
| DIRAS2   | NM_017594    | chr9  | - | 93370112  | 93407109  | 561  | 421  | 4.553535 |

|              |              |       |   |           |           |      |      |          |
|--------------|--------------|-------|---|-----------|-----------|------|------|----------|
| HMGCLL1      | NM_019036    | chr6  | - | 55297169  | 55446013  | 680  | 642  | 4.50821  |
| SYT10        | NM_198992    | chr12 | - | 33526346  | 33594755  | 1199 | 1069 | 4.455865 |
| UNC13C       | NM_001080534 | chr15 | + | 54303099  | 54922807  | 1064 | 781  | 4.35839  |
| FGF20        | NM_019851    | chr8  | - | 16848332  | 16861675  | 1245 | 1111 | 4.305195 |
| C1orf68      | NM_001024679 | chr1  | + | 152689996 | 152694906 | 389  | 0    |          |
| TSTD1        | NM_001113207 | chr1  | - | 161005420 | 161010775 | 1126 | 937  |          |
| LOC642587    | NM_001104548 | chr1  | + | 209600166 | 209607893 | 1964 | 475  |          |
| RGPD2        | NM_001078170 | chr2  | - | 88054716  | 88127287  | 320  | 42   |          |
| RGPD6        | NM_001123363 | chr2  | - | 111269377 | 111338310 | 462  | 376  |          |
| PSAPL1       | NM_001085382 | chr4  | - | 7430019   | 7438701   | 3141 | 2332 |          |
| SERF1B       | NM_022978    | chr5  | + | 69319076  | 69340935  | 939  | 799  |          |
| FAM169A      | NM_015566    | chr5  | - | 74071397  | 74164616  | 2409 | 2369 |          |
| FAM153C      | NM_001079527 | chr5  | + | 177433687 | 177476657 | 306  | 0    |          |
| ZNF879       | NM_001136116 | chr5  | + | 178448774 | 178463389 | 828  | 806  |          |
| C6orf58      | NM_001010905 | chr6  | + | 127896317 | 127914961 | 364  | 194  |          |
| LOC389493    | NM_001145712 | chr7  | - | 56180372  | 56186091  | 625  | 259  |          |
| ZNF727       | NM_001159522 | chr7  | + | 63503819  | 63540928  | 438  | 383  |          |
| WEE2         | NM_001105558 | chr7  | + | 141406151 | 141433072 | 334  | 0    |          |
| LOC100127983 | NM_001190972 | chr8  | - | 91968704  | 91999486  | 1194 | 1157 |          |
| LRRC69       | NM_001129890 | chr8  | + | 92112845  | 92233465  | 857  | 789  |          |
| SCXA         | NM_001008271 | chr8  | + | 145488601 | 145494132 | 4847 | 4677 |          |
| ANKRD20A4    | NM_001098805 | chr9  | + | 69379979  | 69427110  | 131  | 67   |          |
| KRTAP5-5     | NM_001001480 | chr11 | + | 1649031   | 1654160   | 731  | 698  |          |



|           |              |       |   |           |           |      |      |
|-----------|--------------|-------|---|-----------|-----------|------|------|
| LOC283299 | NM_001190788 | chr11 | - | 7870296   | 7929503   | 1999 | 1959 |
| KLRF2     | NM_001190765 | chr12 | + | 10032086  | 10050433  | 229  | 0    |
| SLC15A5   | NM_001170798 | chr12 | - | 16339417  | 16432620  | 502  | 64   |
| C12orf71  | NM_001080406 | chr12 | - | 27231988  | 27237456  | 856  | 626  |
| SFTA3     | NM_001101341 | chr14 | - | 36940492  | 36984991  | 5891 | 4350 |
| CT62      | NM_001102658 | chr15 | - | 71400581  | 71409840  | 2780 | 2221 |
| GOLGA6C   | NM_001164404 | chr15 | + | 75548897  | 75567797  | 412  | 381  |
| LGALS9B   | NM_001042685 | chr17 | - | 20351174  | 20372849  | 2786 | 2017 |
| LOC730755 | NM_001165252 | chr17 | - | 39213491  | 39218345  | 1206 | 1040 |
| KRTAP4-7  | NM_033061    | chr17 | + | 39238457  | 39243397  | 723  | 516  |
| KRTAP4-8  | NM_031960    | chr17 | - | 39251232  | 39256376  | 529  | 68   |
| KRTAP4-9  | NM_001146041 | chr17 | + | 39259639  | 39264741  | 471  | 431  |
| LOC643008 | NM_001162995 | chr17 | + | 73627512  | 73639487  | 4925 | 4230 |
| FLJ22184  | NM_001190467 | chr19 | - | 7931603   | 7941327   | 5793 | 5734 |
| ZNF878    | NM_001080404 | chr19 | - | 12152618  | 12169128  | 1173 | 1029 |
| SRRM5     | NM_001145641 | chr19 | + | 44114251  | 44120651  | 151  | 65   |
| F8A3      | NM_001007524 | chrX  | - | 154685144 | 154690262 | 207  | 71   |
| H2AFB3    | NM_080720    | chrX  | - | 154687078 | 154691597 | 207  | 71   |
